# Supplementary material for: Archeometrical Characterization of Rock-Art Pigments from Puerto Roque Open-Air Rock Art Shelter (Valencia De Alcantara, Extremadura, Spain)
Source: Preprints.org preprint supplement (doi:10.20944/preprints202312.0951.v1), 2023-12-13
Supplement: Supplementary file 1 [file supplementary]

ARCHEOMETRICAL CHARACTERIZATION OF ROCK-ART  
PIGMENTS FROM PUERTO ROQUE OPEN-AIR ROCK ART SHELTER  
(VALENCIA DE ALCÁNTARA, EXTREMADURA, SPAIN)

SUPPLEMENTARY MATERIALS

FIGURES 4 - 22

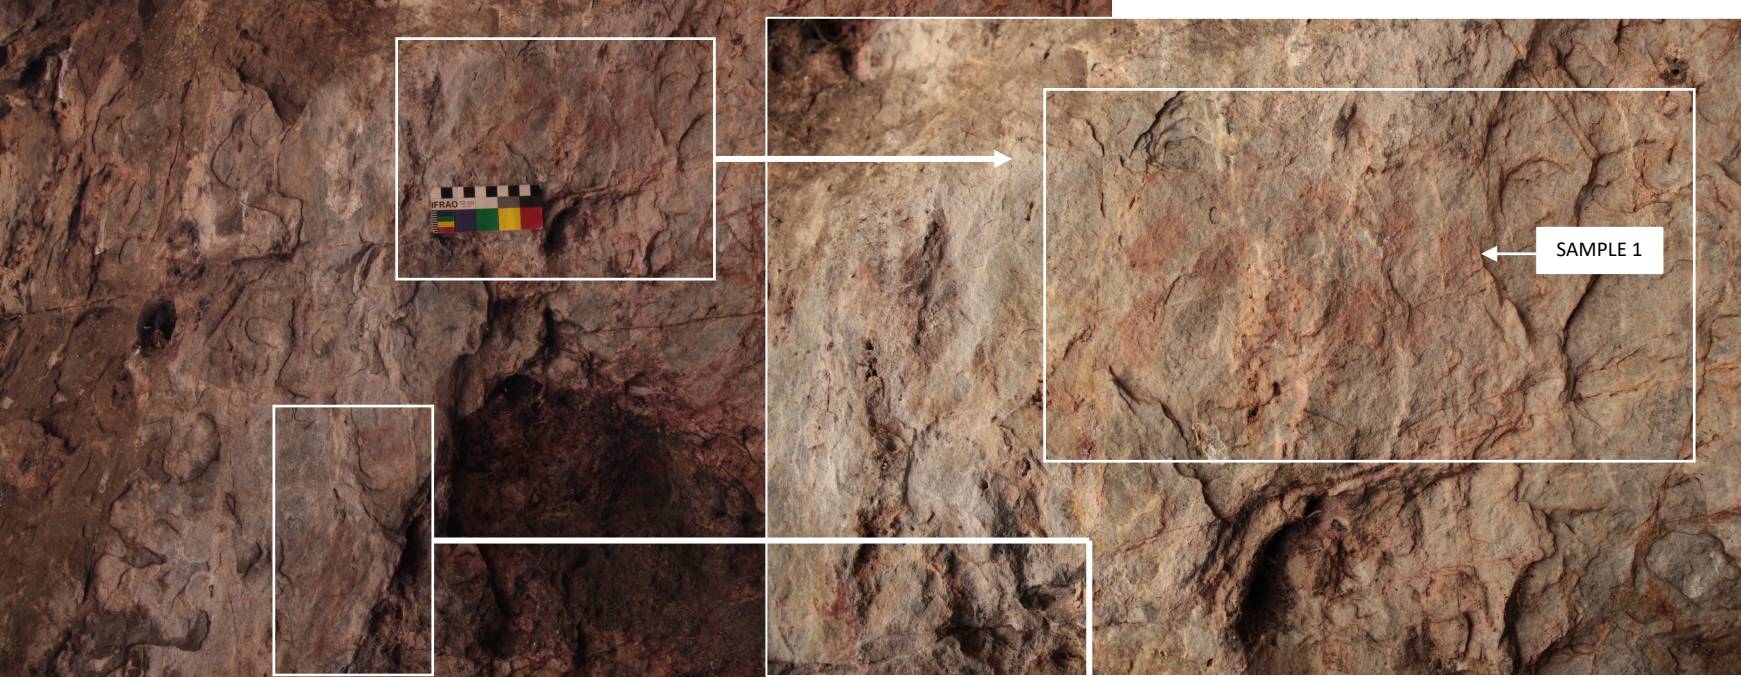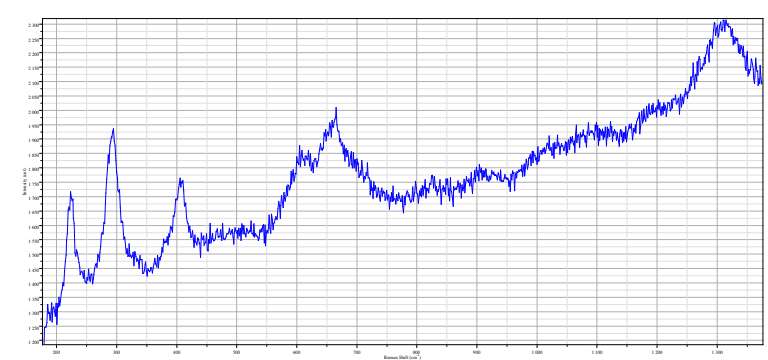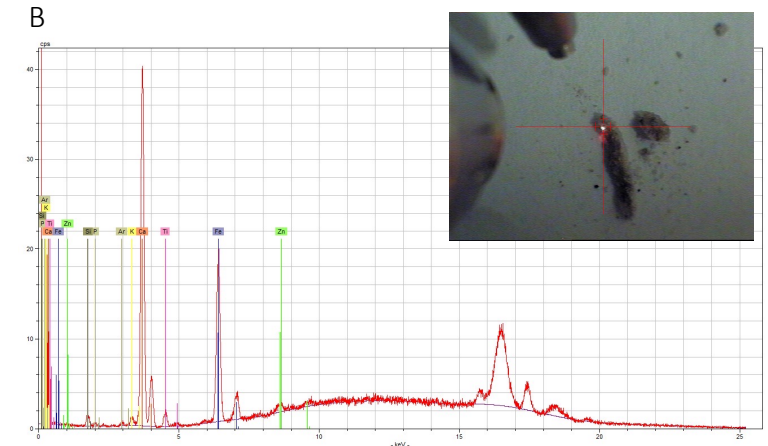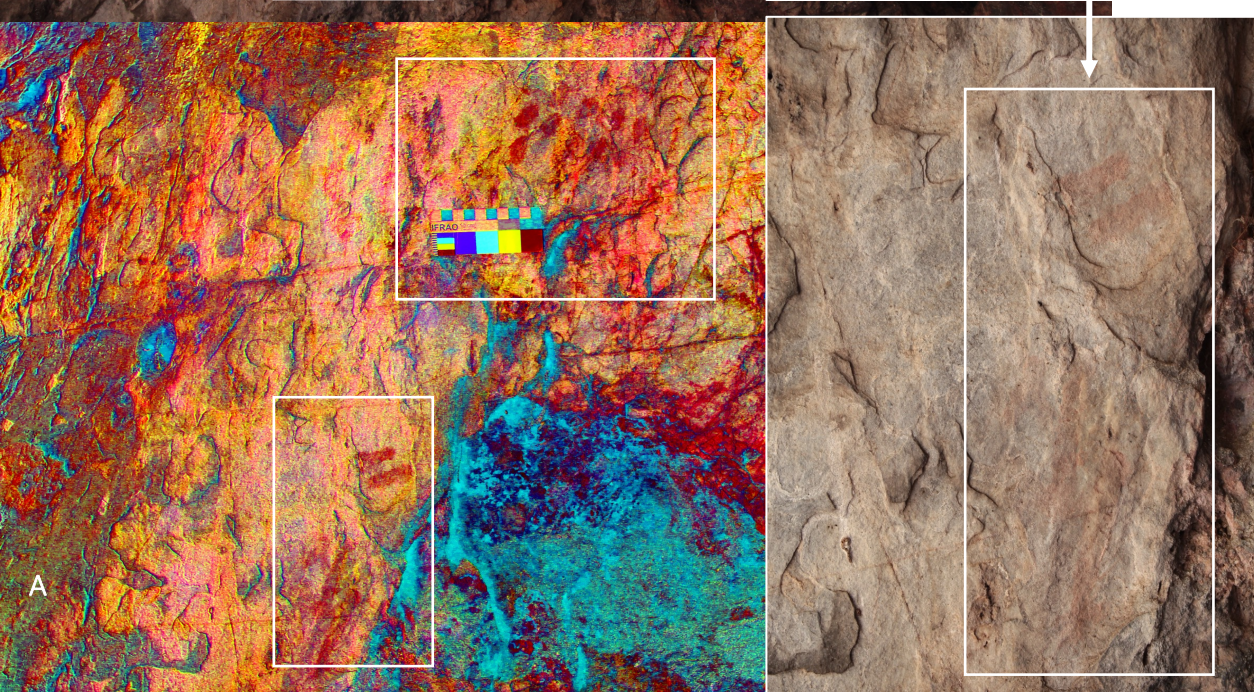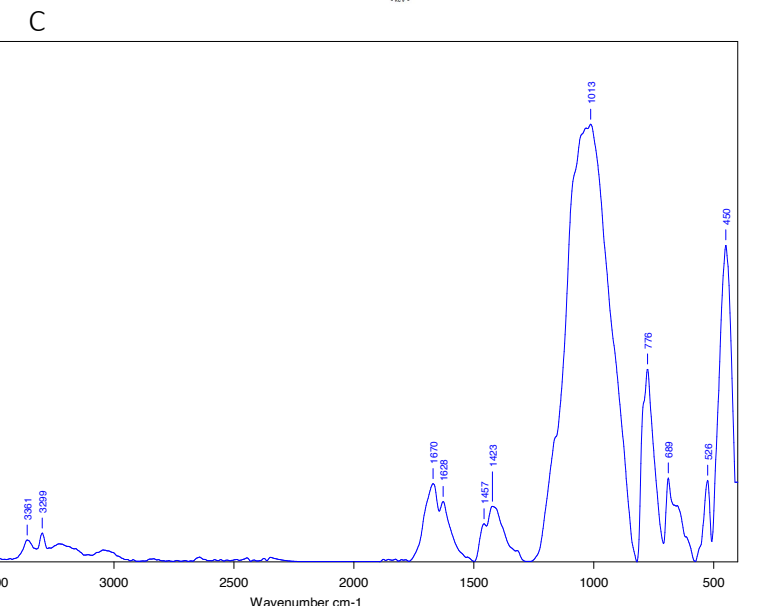

FIGURE 4: SAMPLE PUERTO\_1 FIGURES AND SAMPLING LOCATION (A); MICRO-RAMAN (B); EDXRF (C) AND ATR-FTIR (D) SPECTRA.

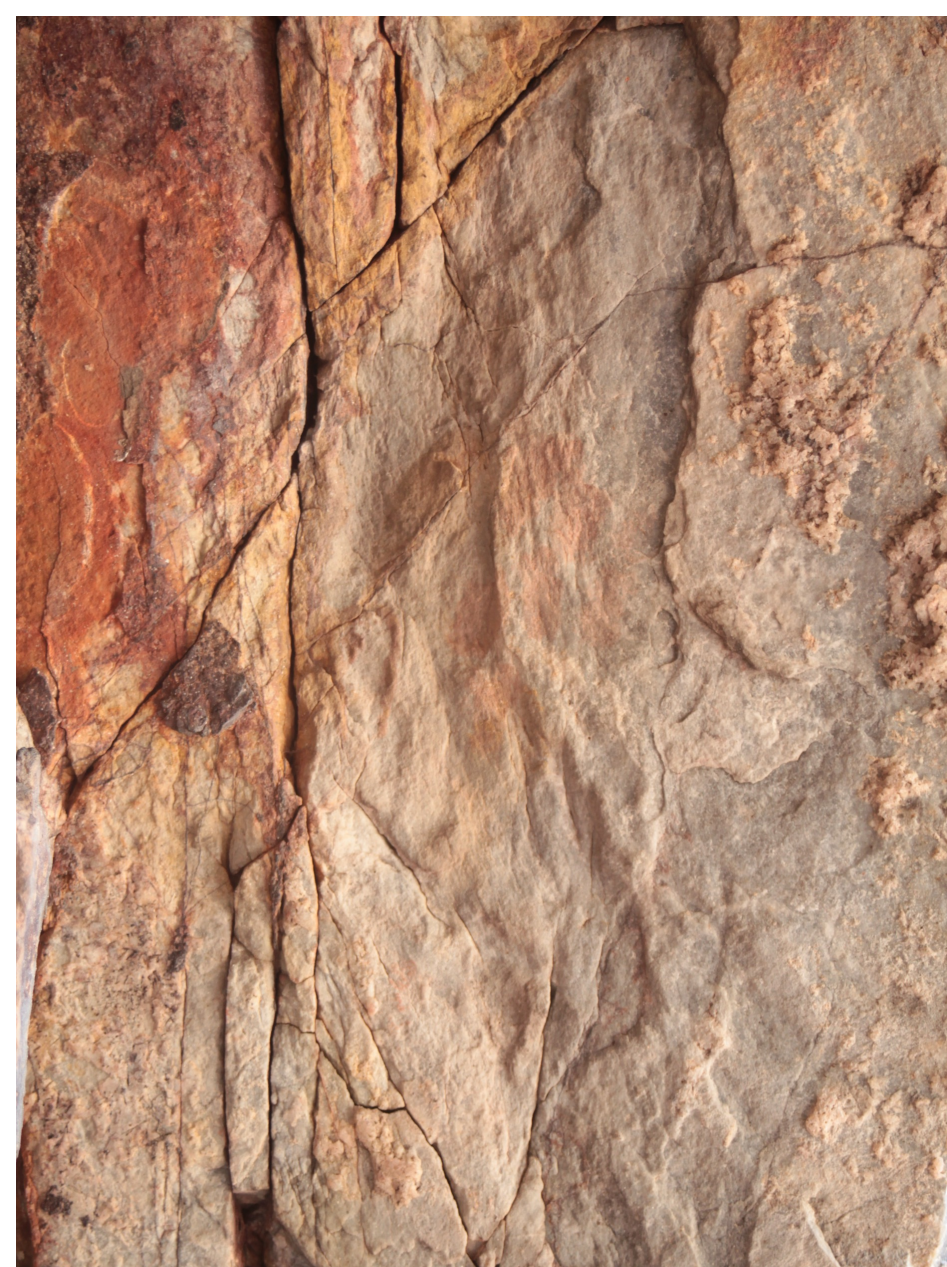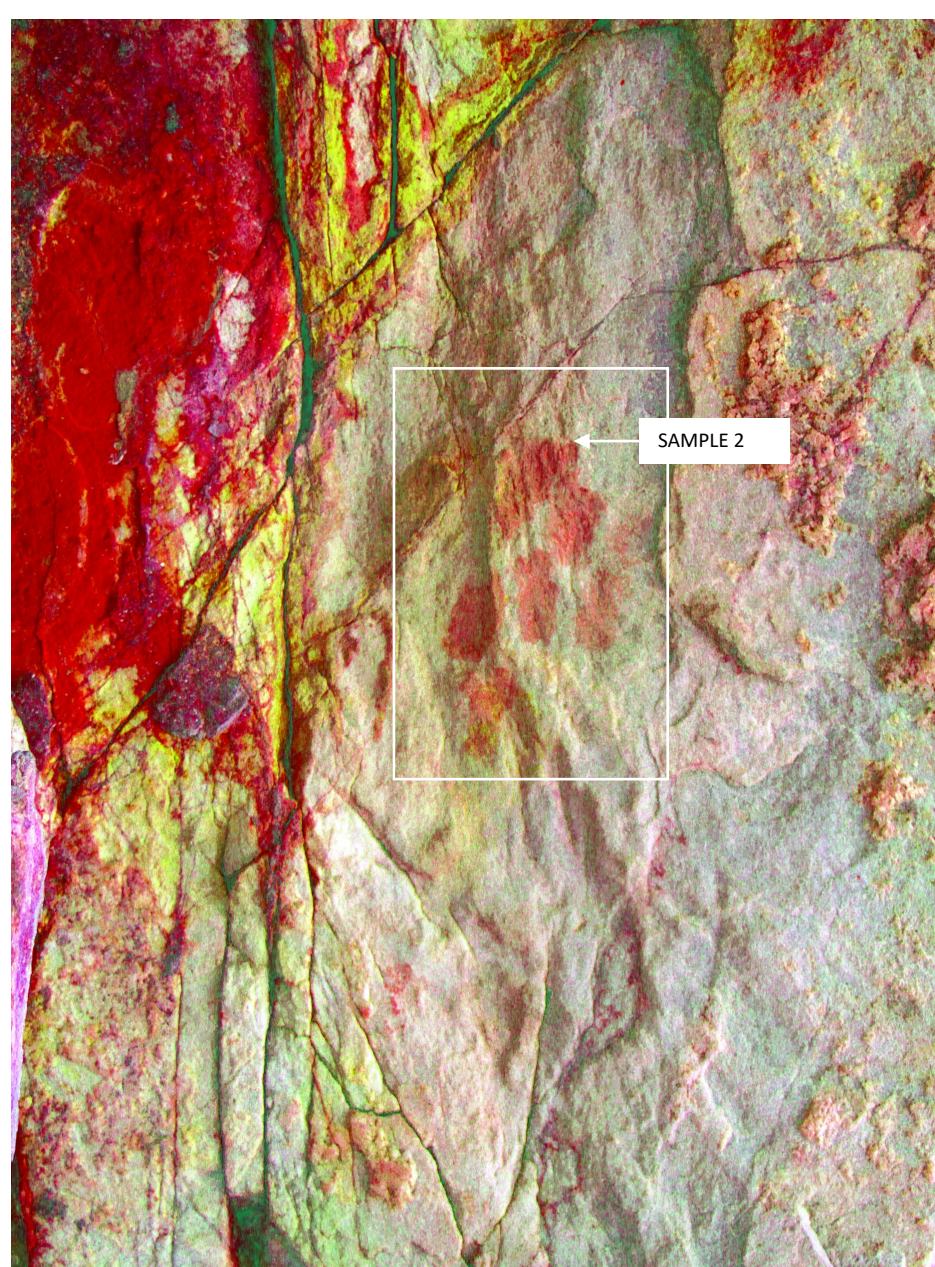

PANEL 2

FIGURE 5: SAMPLE PUERTO\_2 FIGURES AND SAMPLING LOCATION.

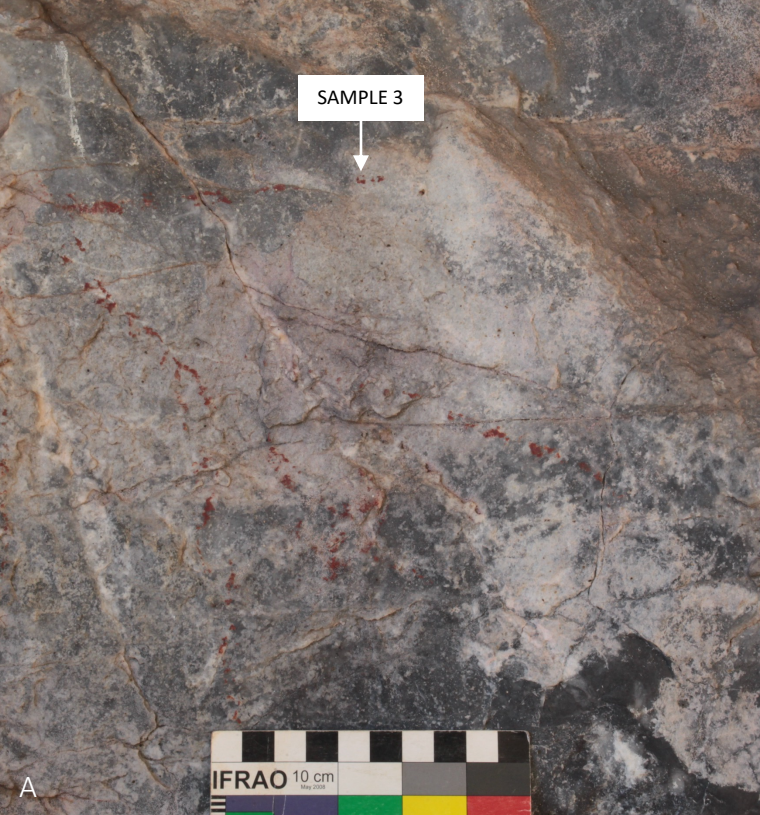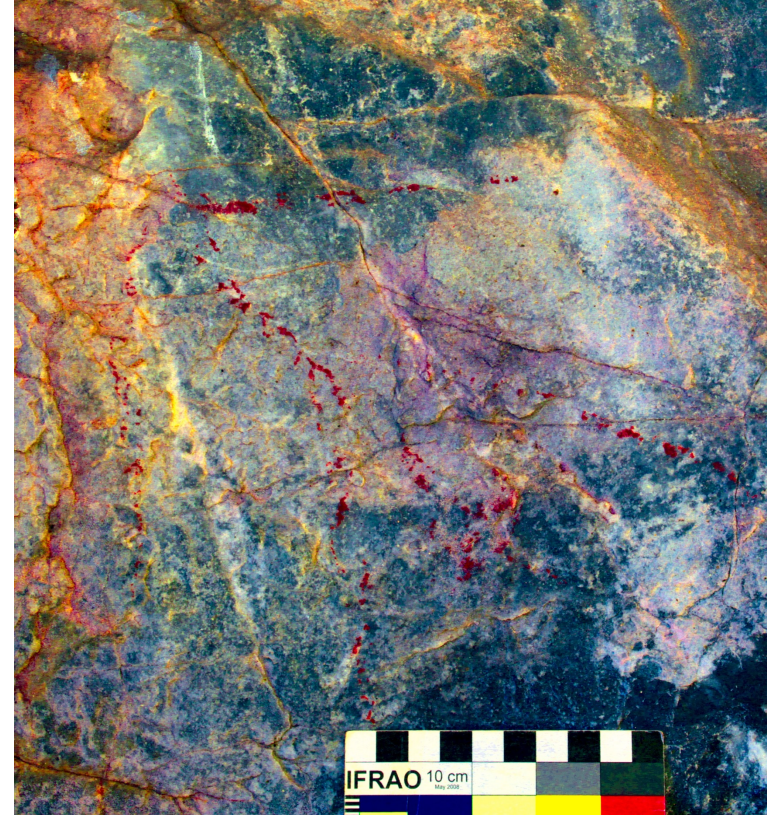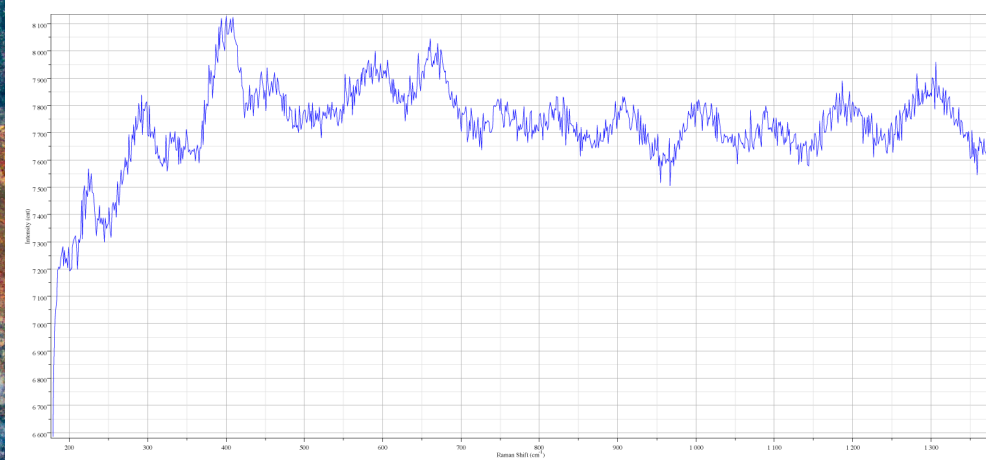

B

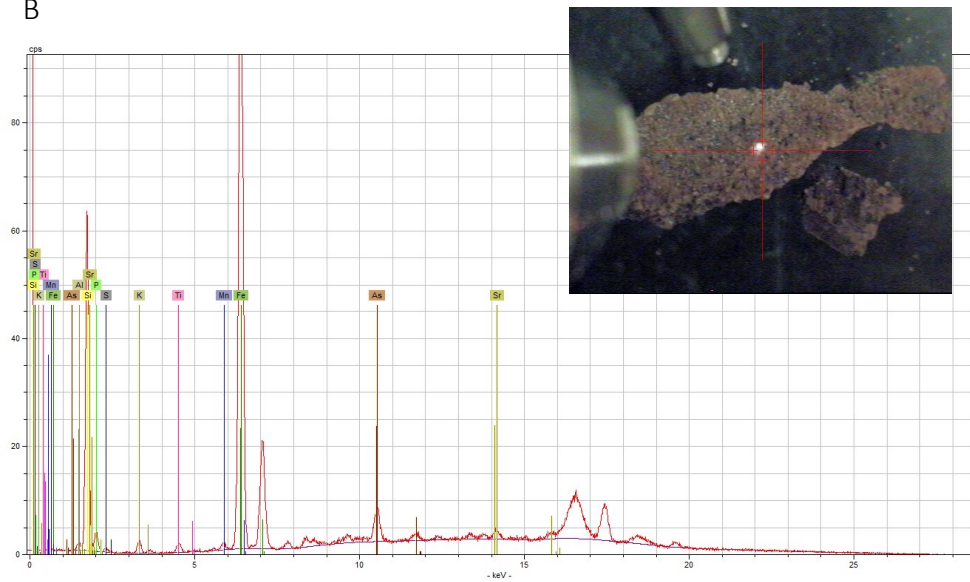

C

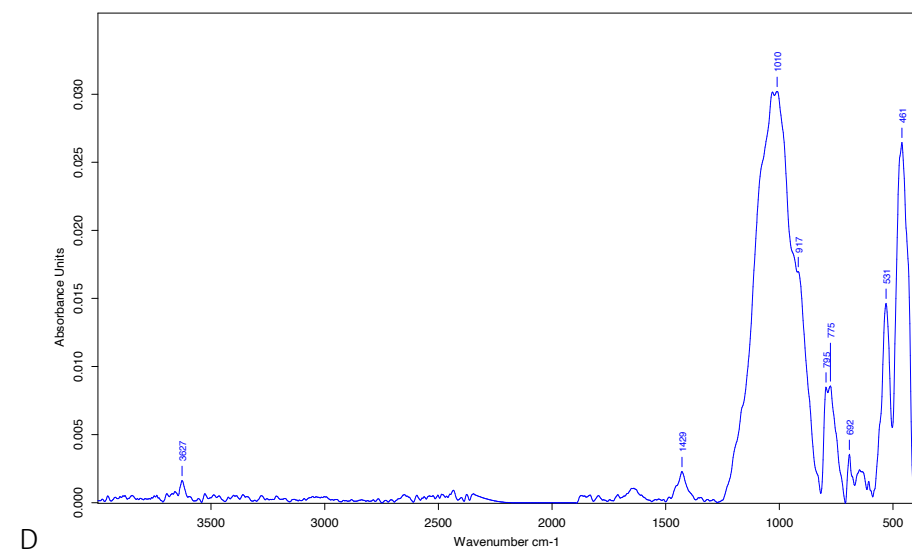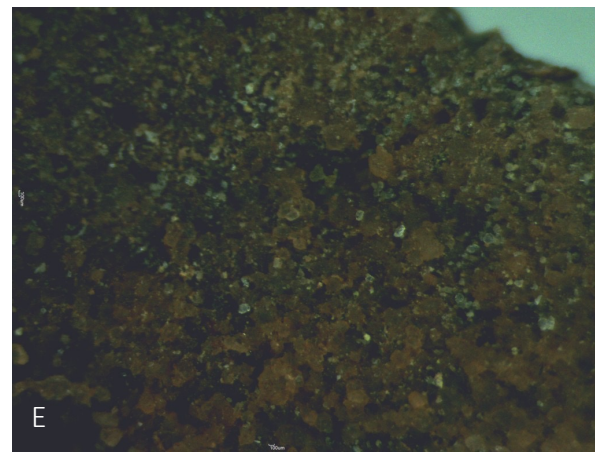

PANEL 3

FIGURE 6: SAMPLE PUERTO\_3 FIGURES AND SAMPLING LOCATION (A); MICRO-RAMAN (B) EDXRF (C) AND ATR-FTIR (D) SPECTRA AND STEREO MICROSCOPE IMAGE (E).

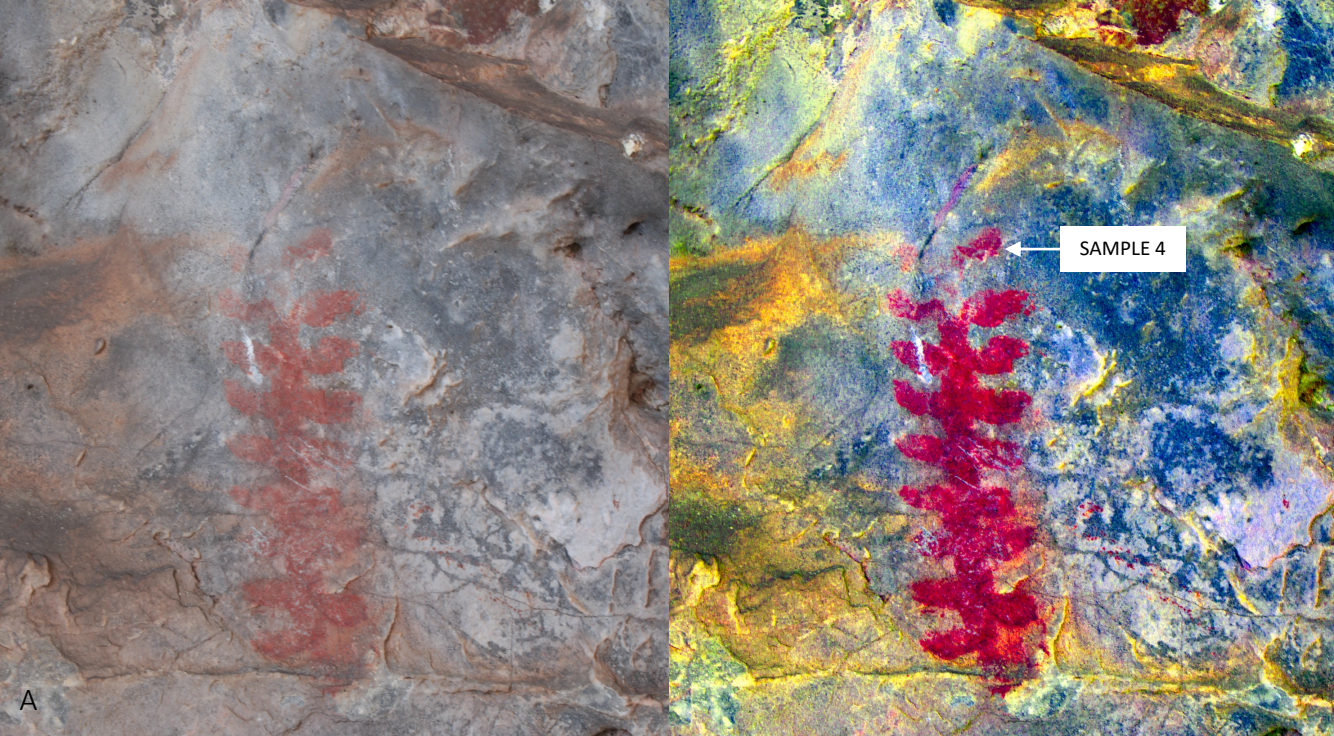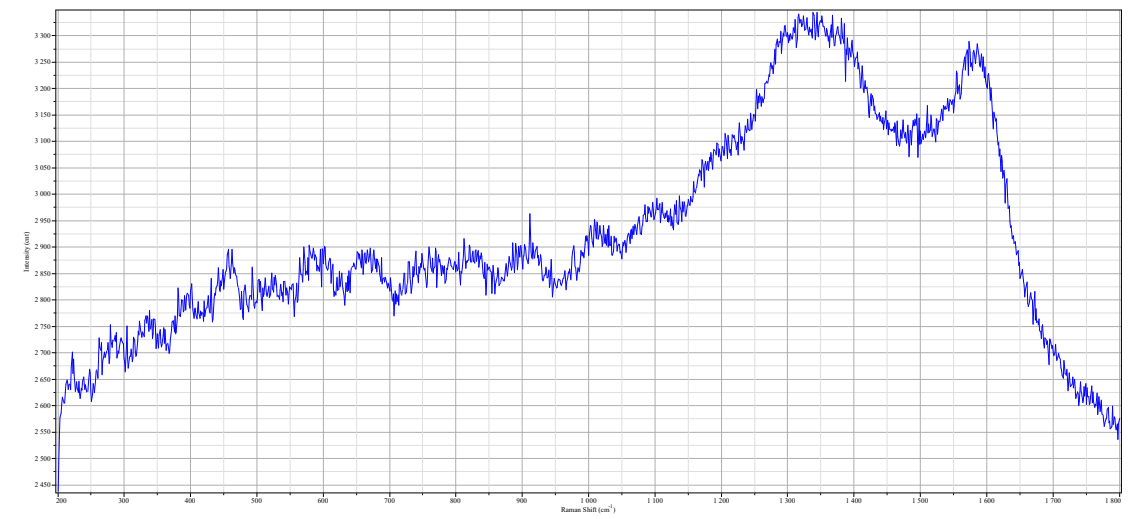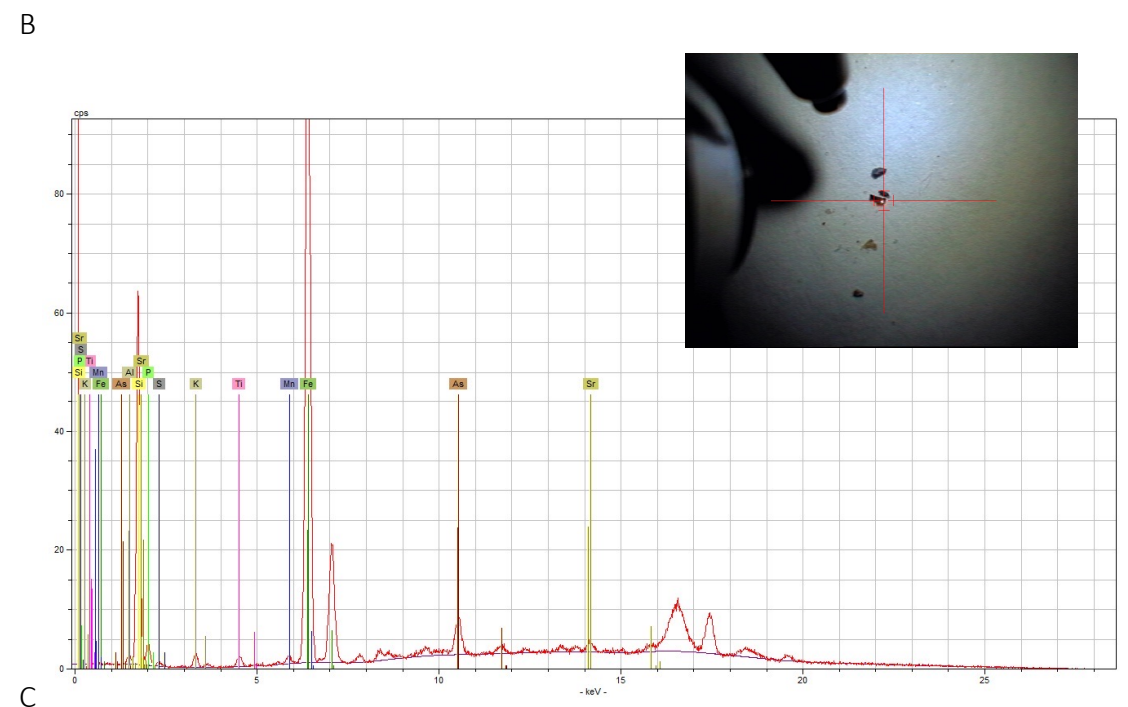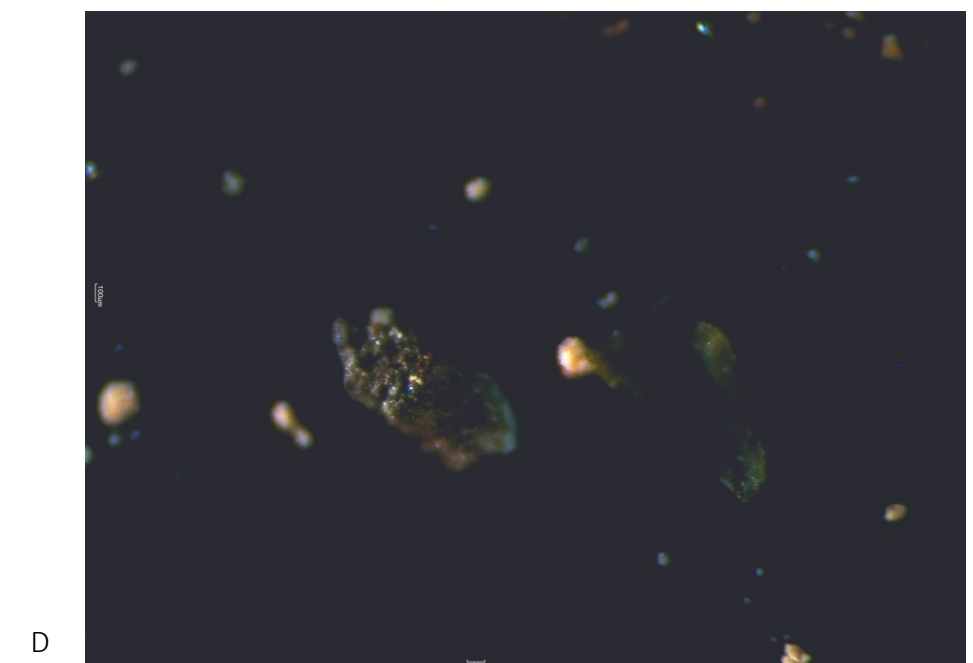

PANEL 4

**FIGURE 7: SAMPLE PUERTO\_4 FIGURES AND SAMPLING LOCATION (A); MICRO-RAMAN (B) AND EDXRF (C) SPECTRA AND STEREO MICROSCOPE IMAGE (D).**

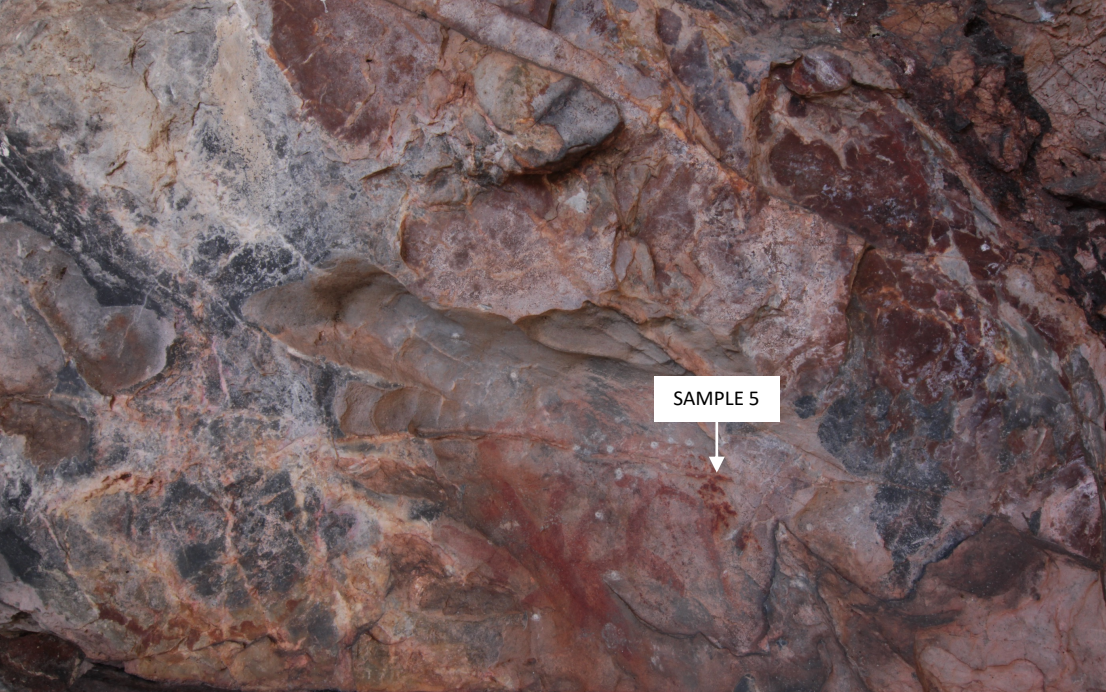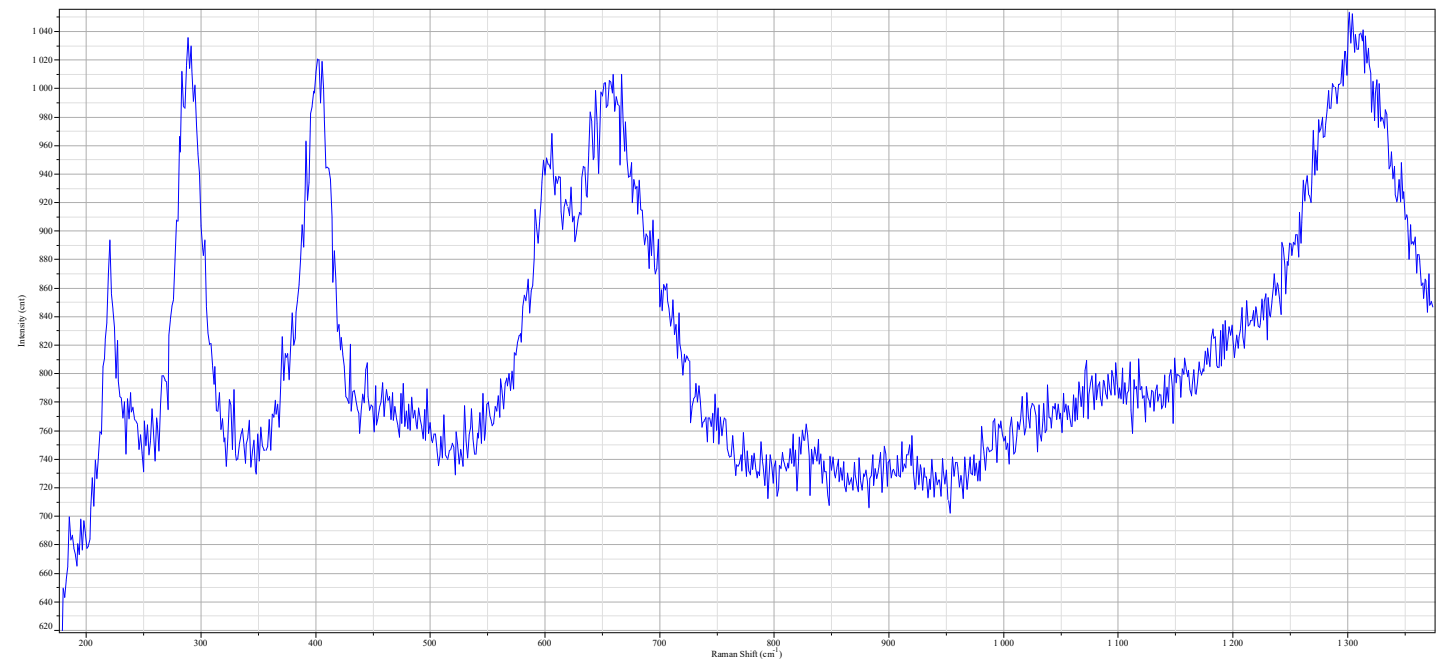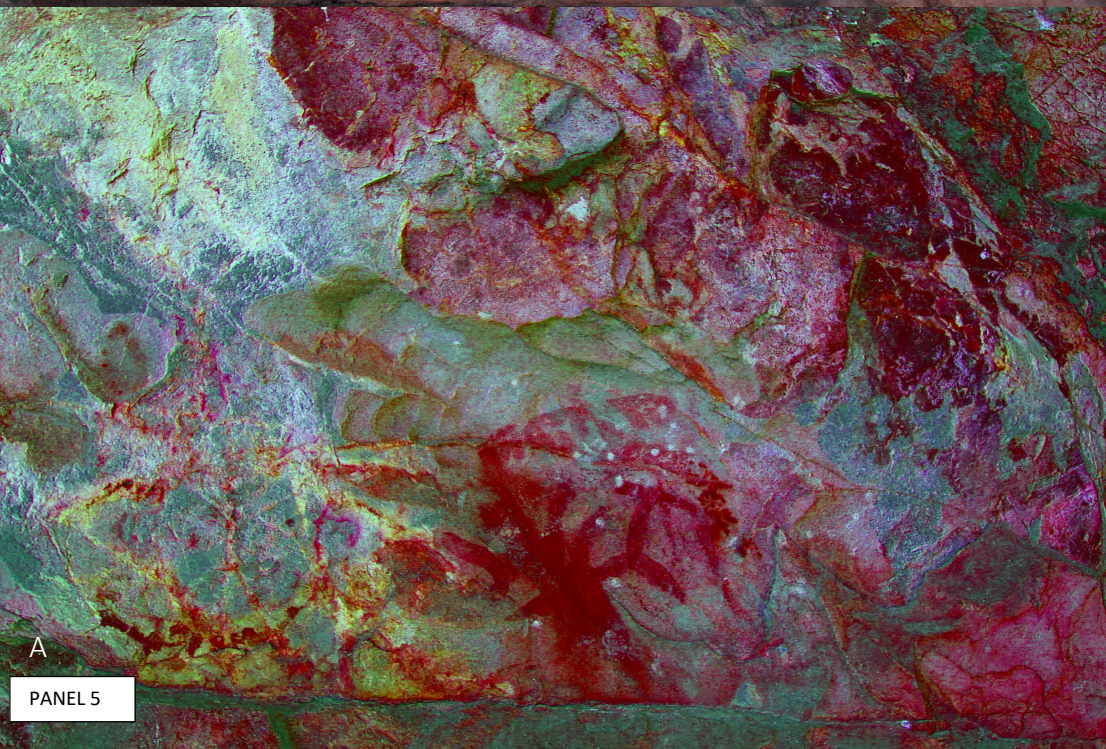

B

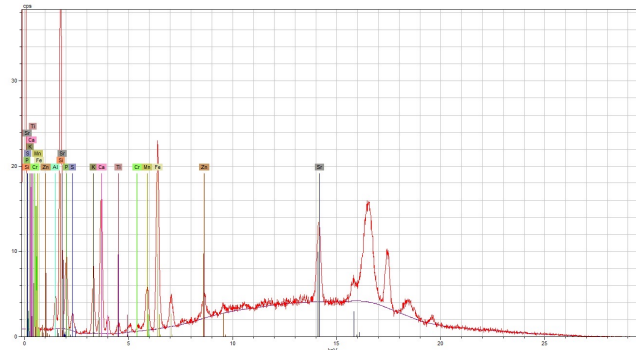

C

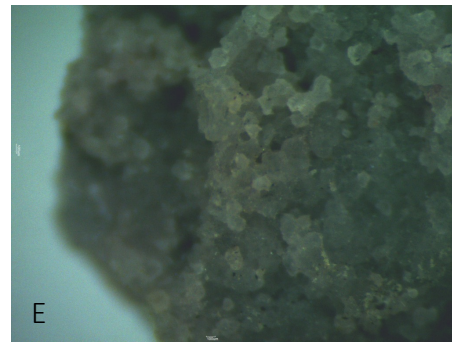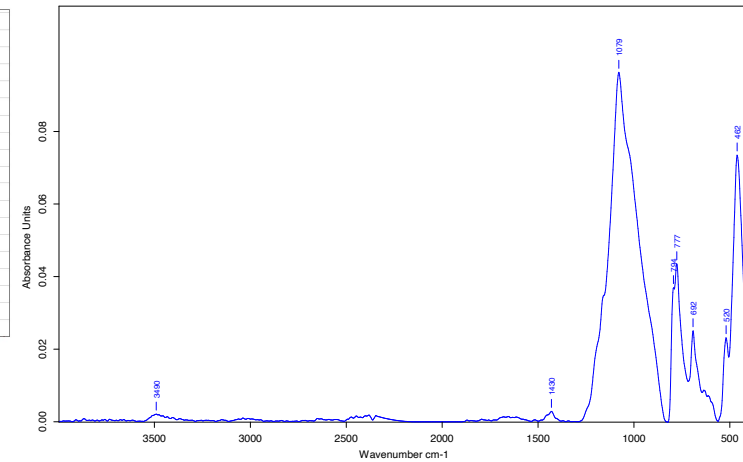

D

**FIGURE 8:** SAMPLE PUERTO\_5 FIGURES AND SAMPLING LOCATION (A); MICRO-RAMAN (B), EDXRF (C) AND ATR-FTIR (D) SPECTRA AND STEREO MICROSCOPE IMAGE (E).

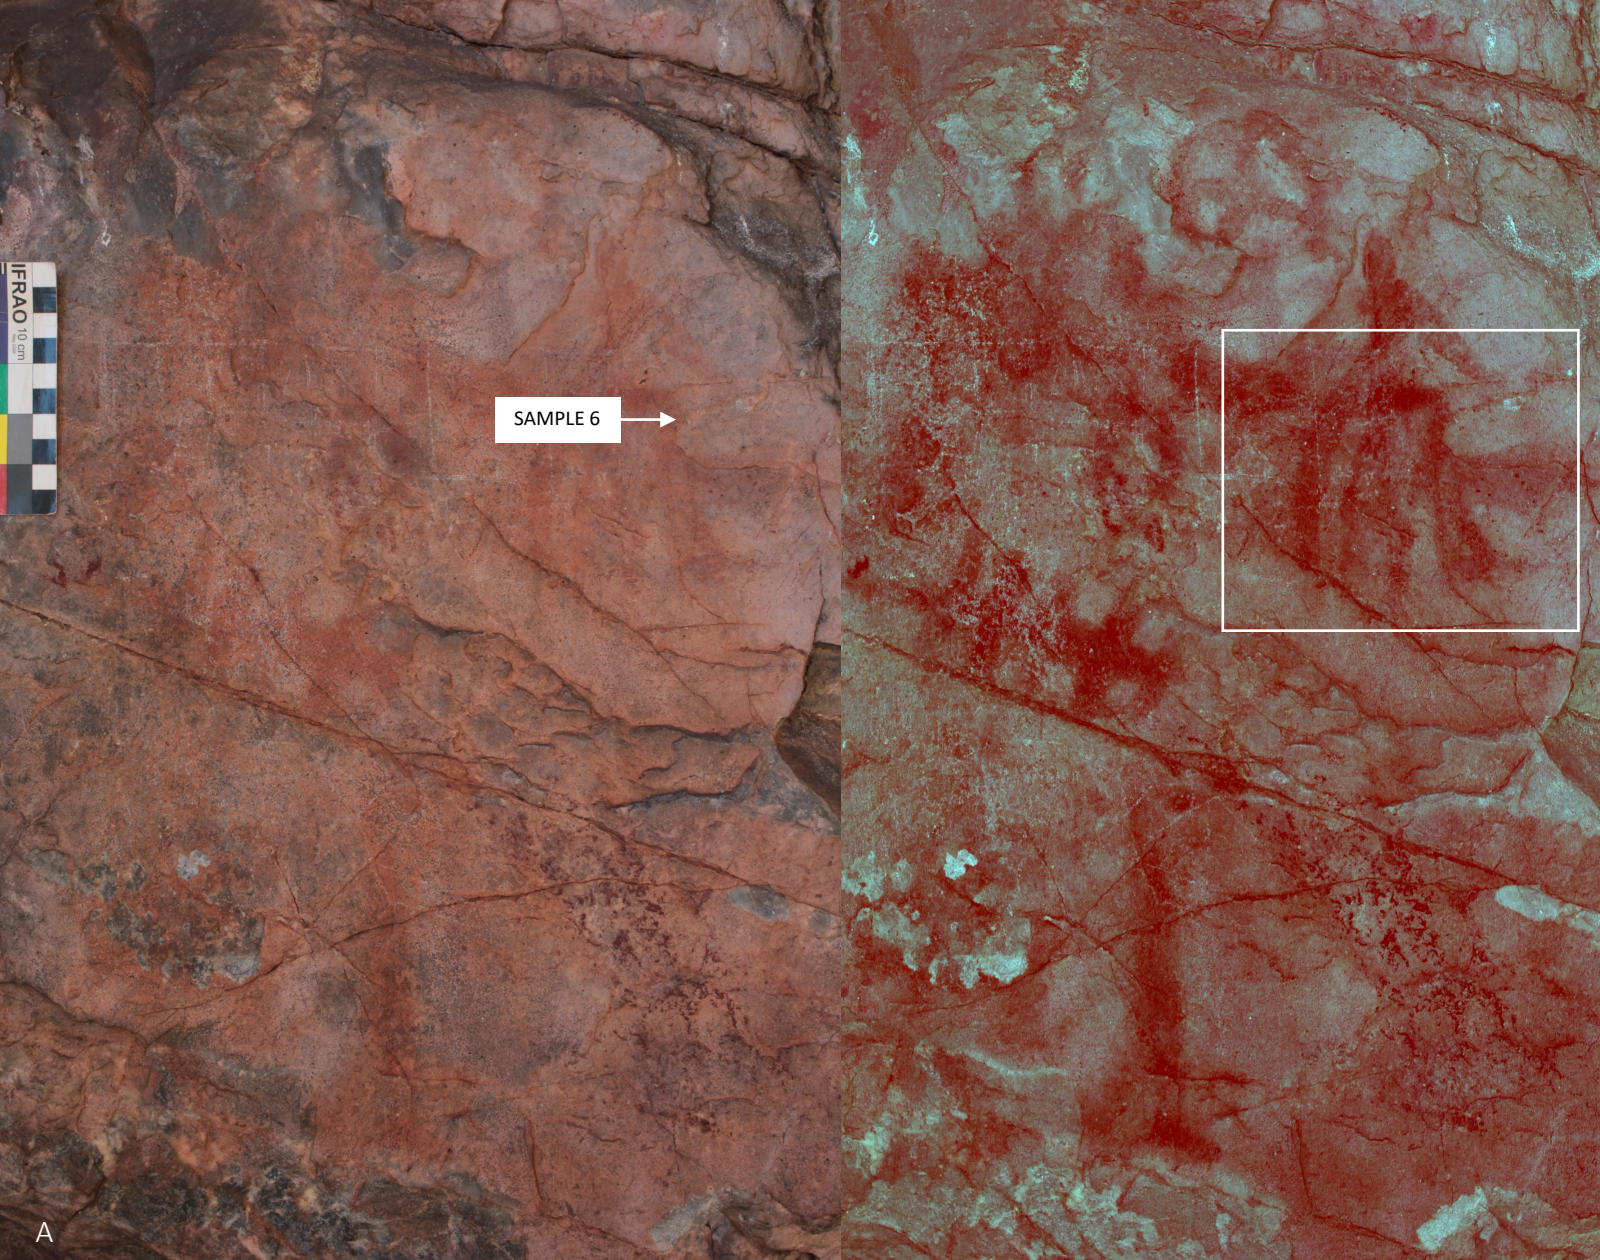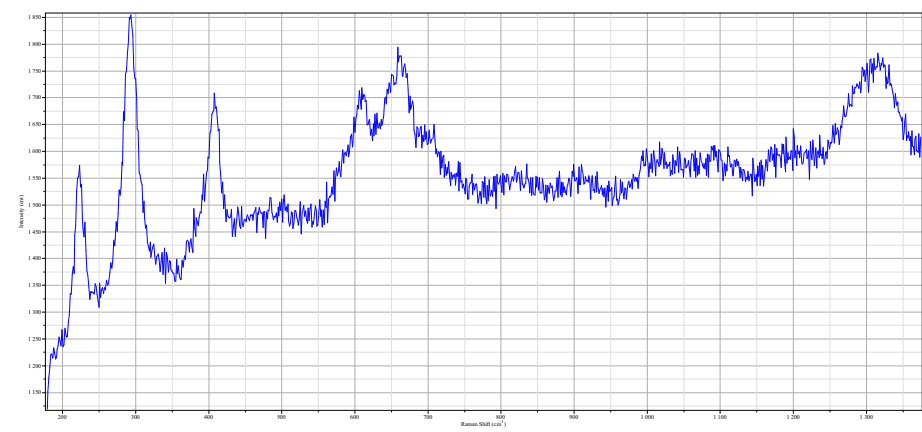

B

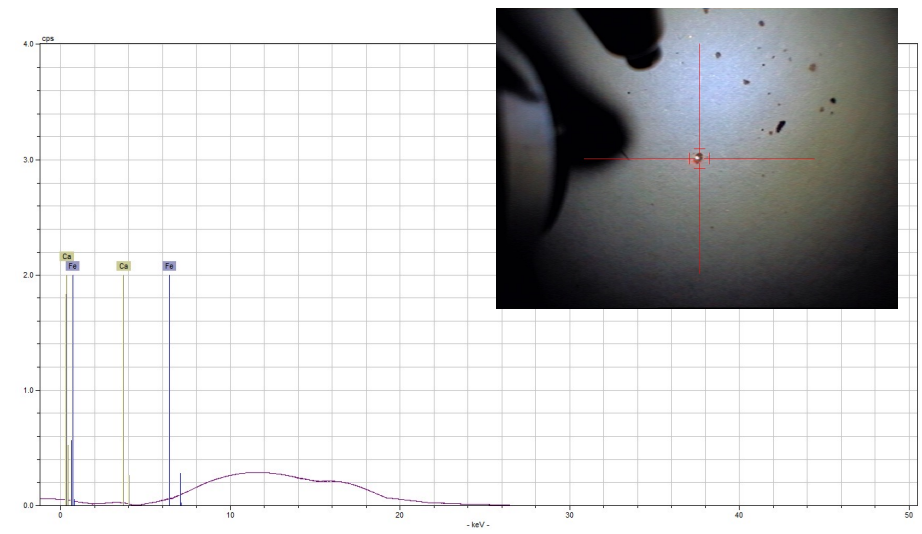

C

**FIGURE 9: SAMPLE PUERTO\_6 FIGURES AND SAMPLING LOCATION (A); MICRO-RAMAN (B) AND EDXRF (C) SPECTRA.**

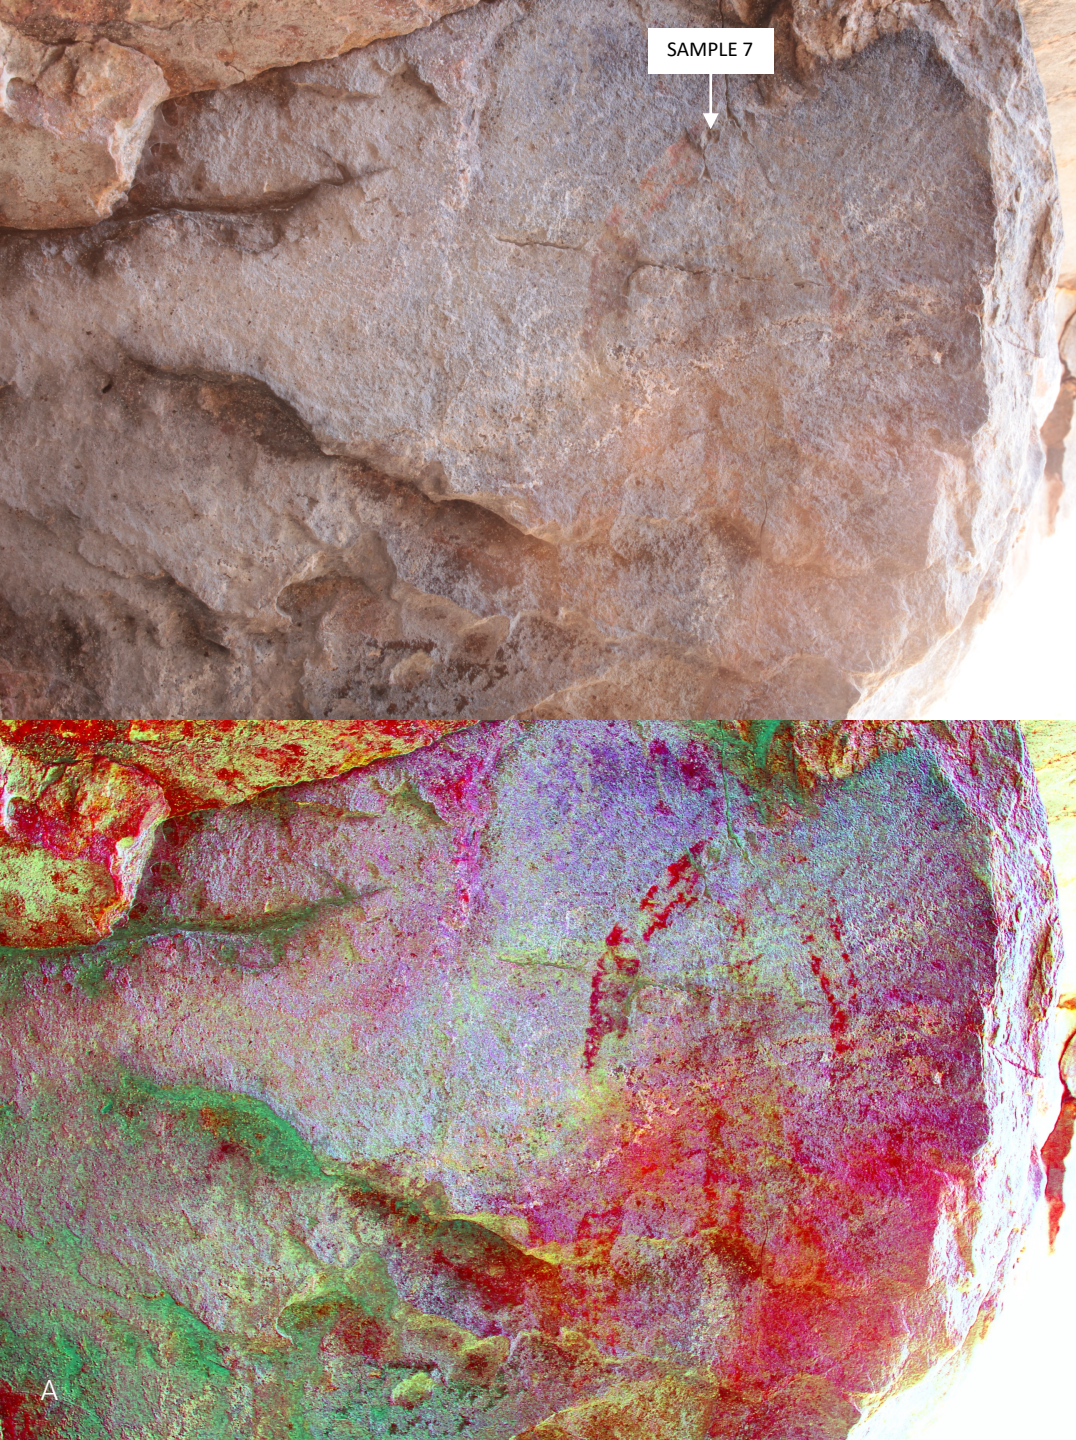

A

SAMPLE 7

PANEL 7

**FIGURE 10:** SAMPLE PUERTO\_7 FIGURES AND SAMPLING LOCATION (A); MICRO-RAMAN (B), EDXRF (C) AND ATR-FTIR (D) SPECTRA AND STEREO MICROSCOPE IMAGE (E).

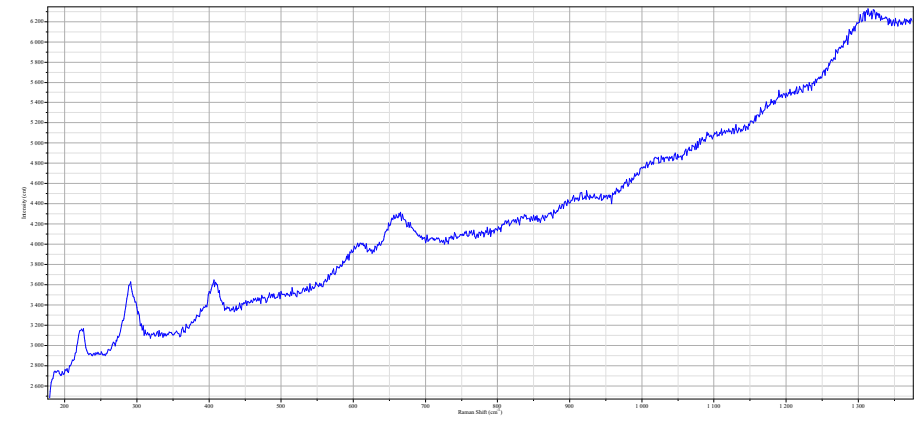

B

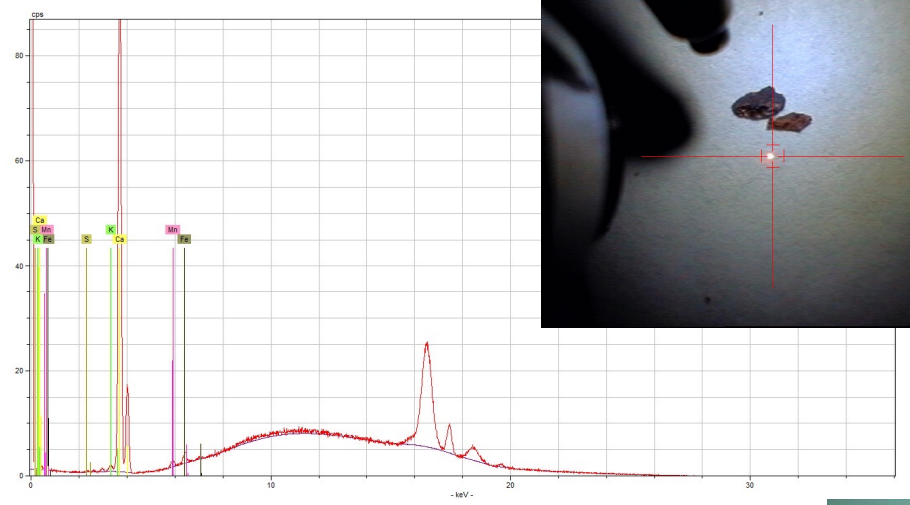

C

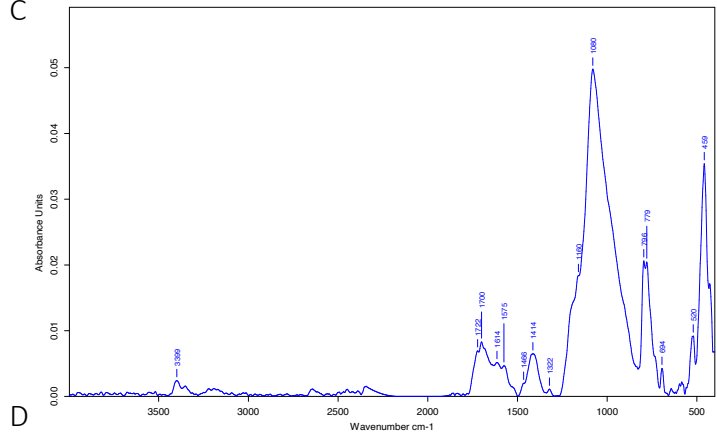

D

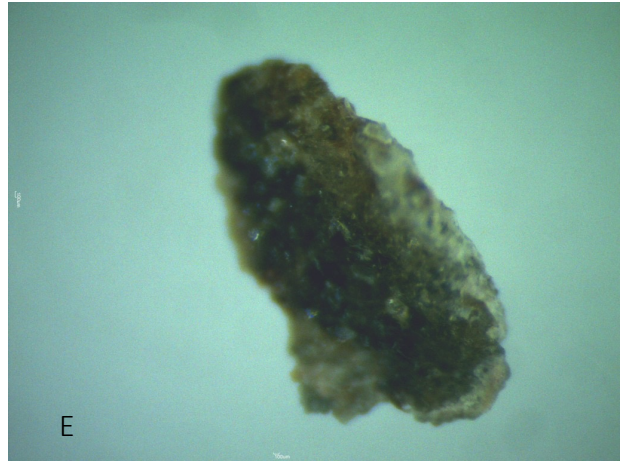

E

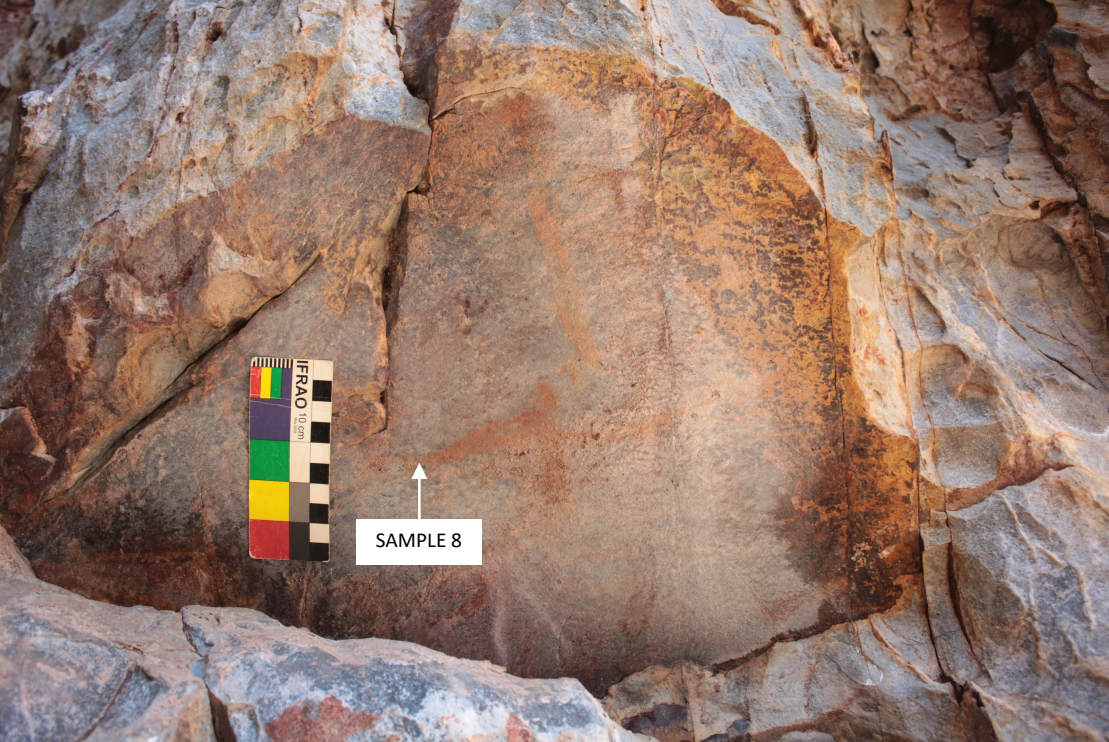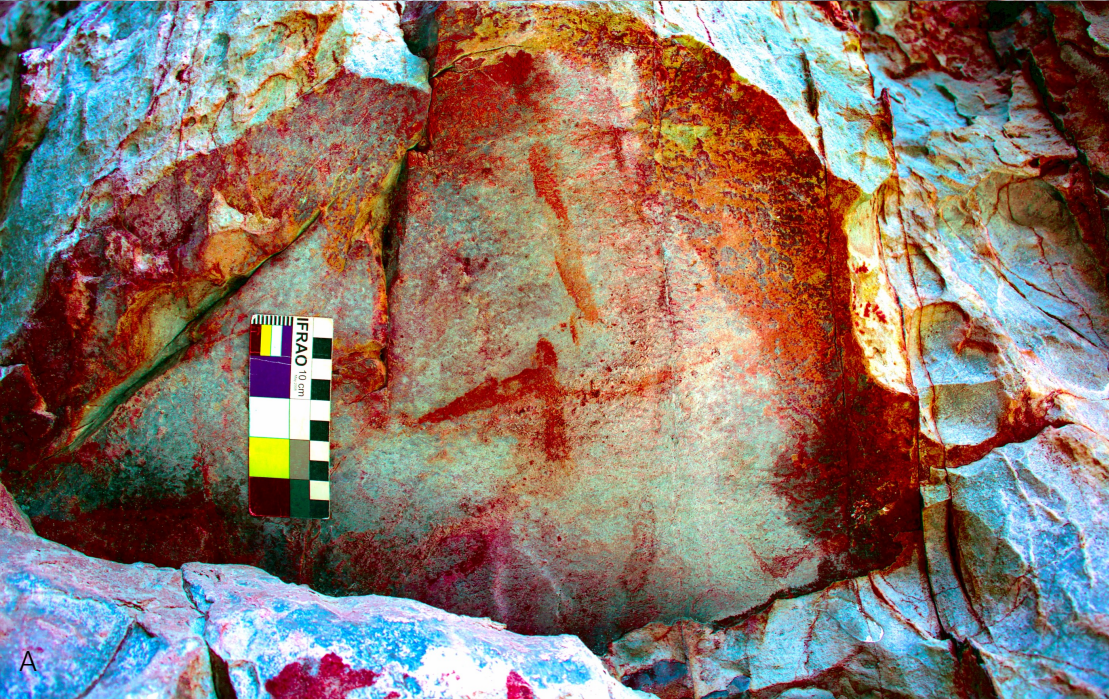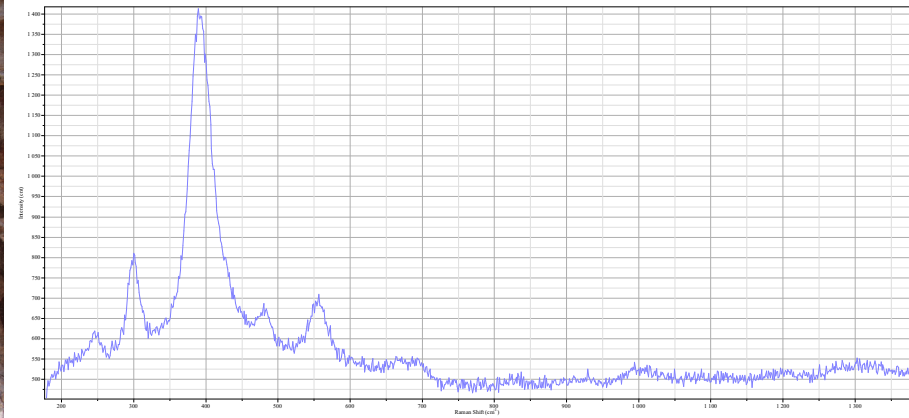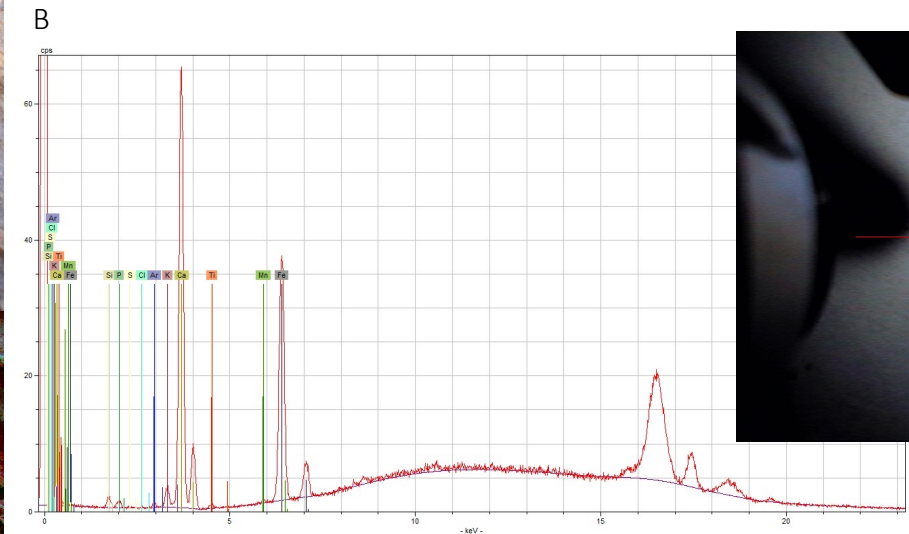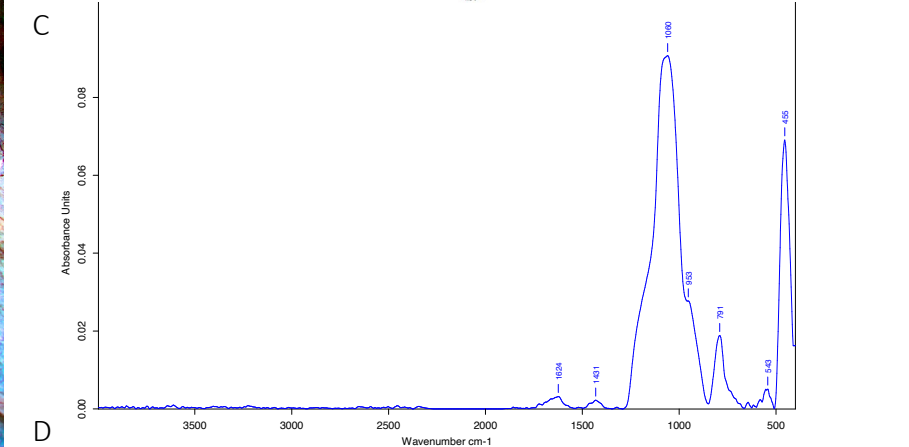

**FIGURE 11:** SAMPLE PUERTO\_8 FIGURES AND SAMPLING LOCATION (A); MICRO-RAMAN (B) AND EDXRF (C), AND ATR-FTIR (D) SPECTRA.

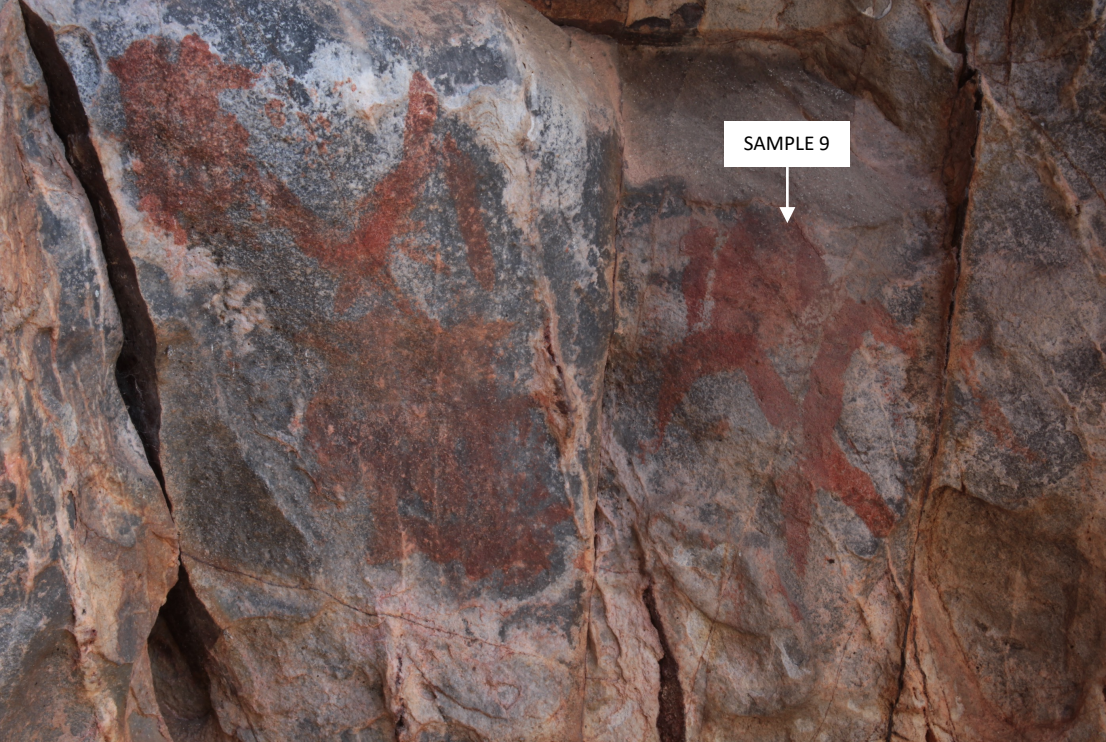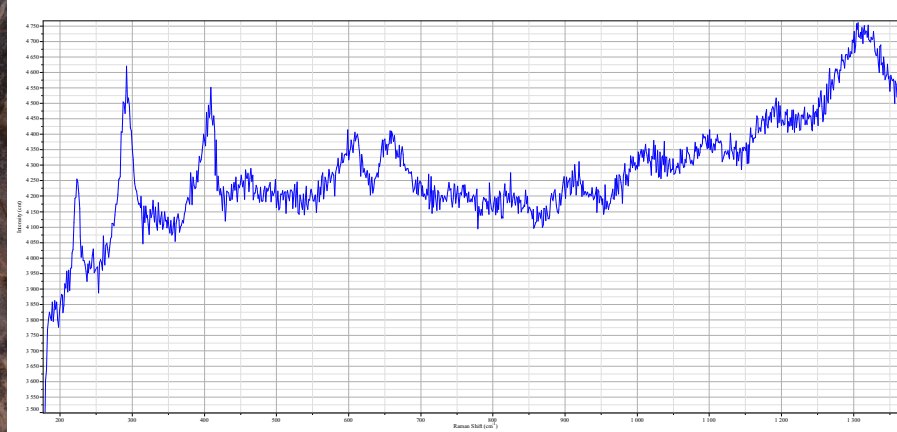

**FIGURE 12:** SAMPLE PUERTO\_9 FIGURES AND SAMPLING LOCATION (A); MICRO-RAMAN (B) EDXRF (C) AND ATR-FTIR (D) SPECTRA AND STEREO MICROSCOPE IMAGE (E).

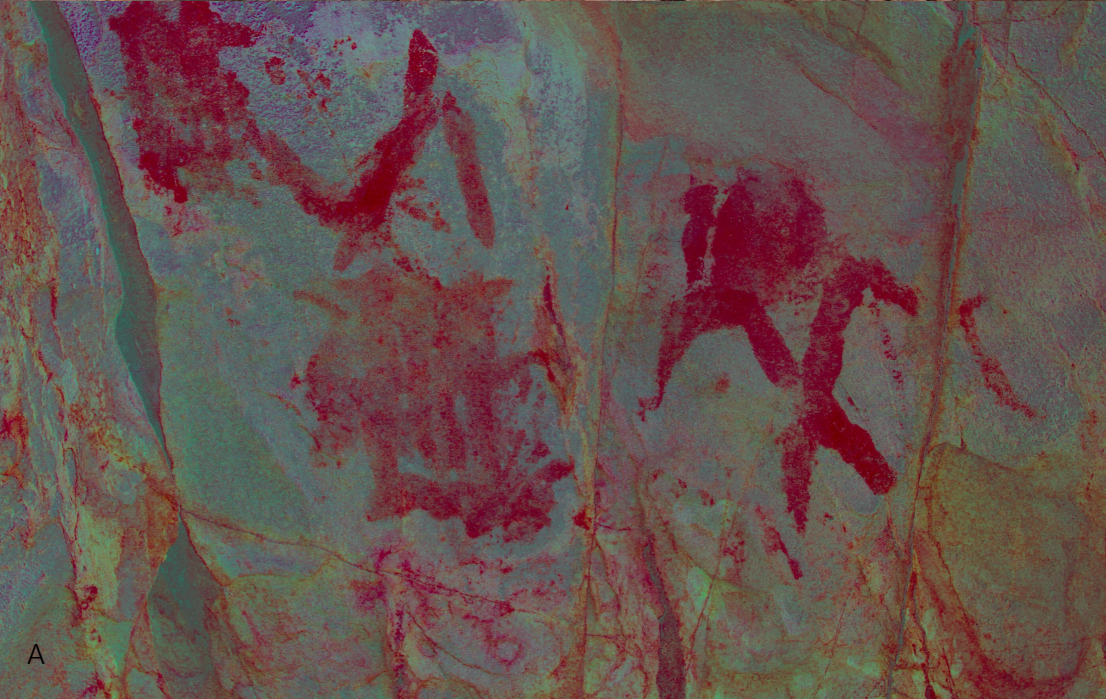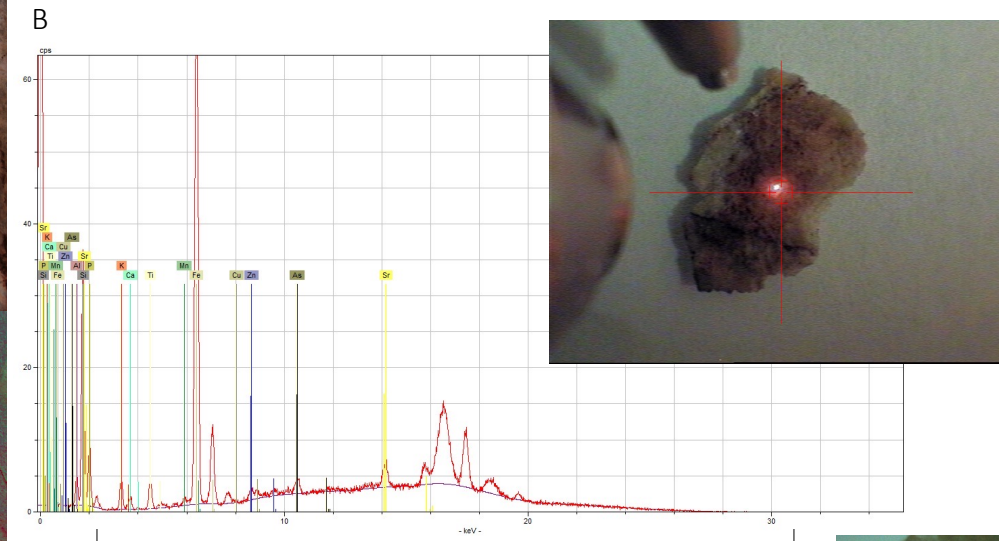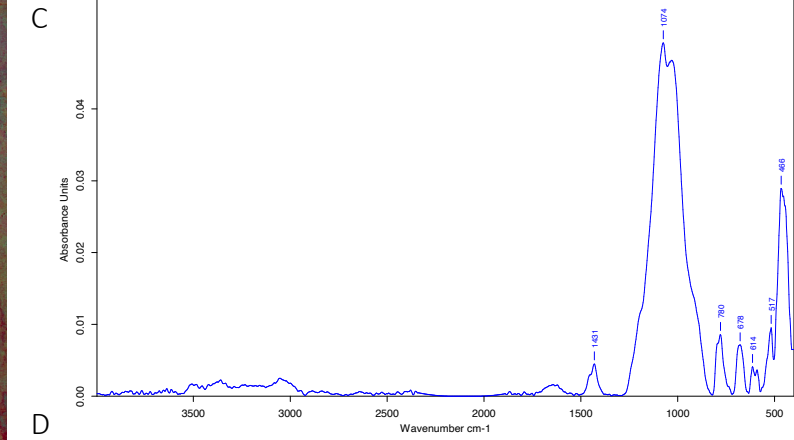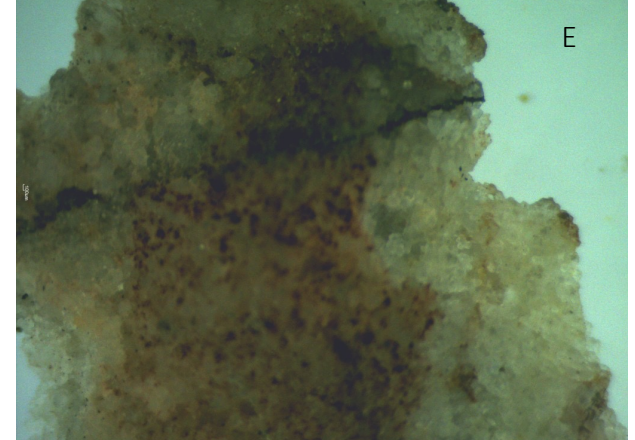

A

E

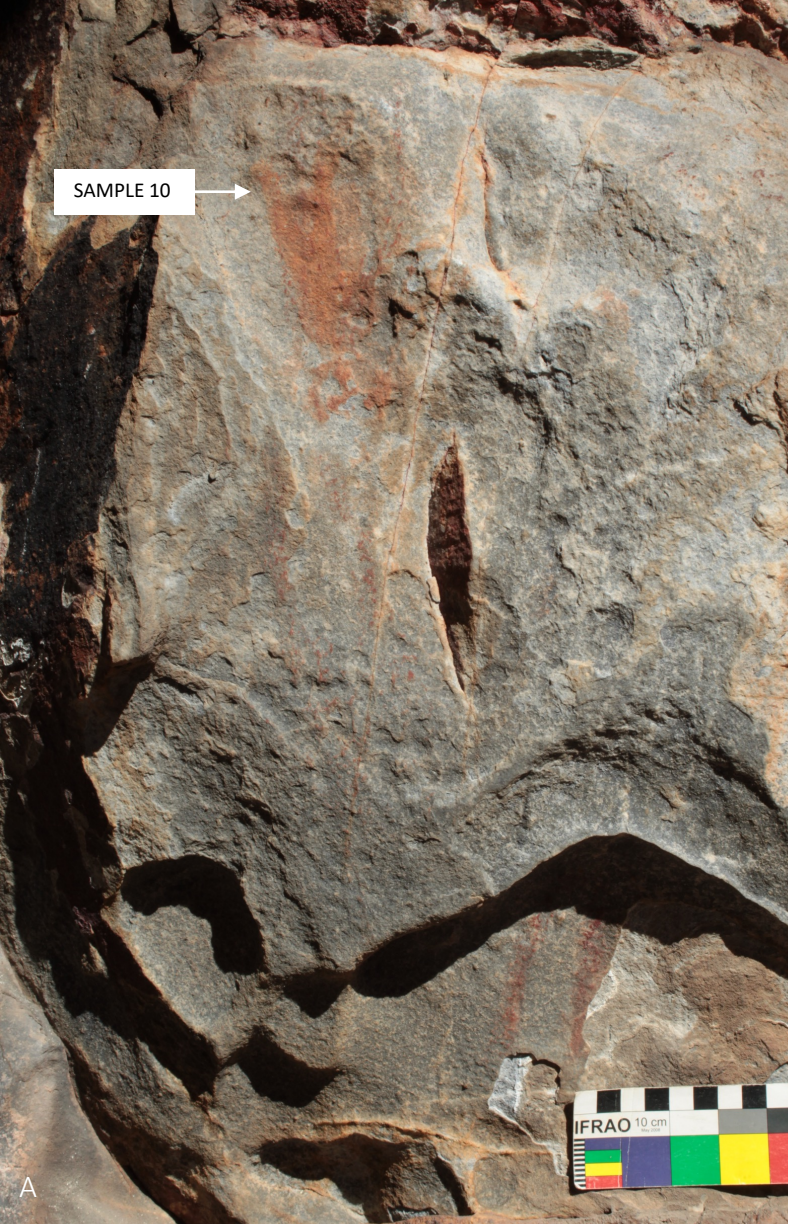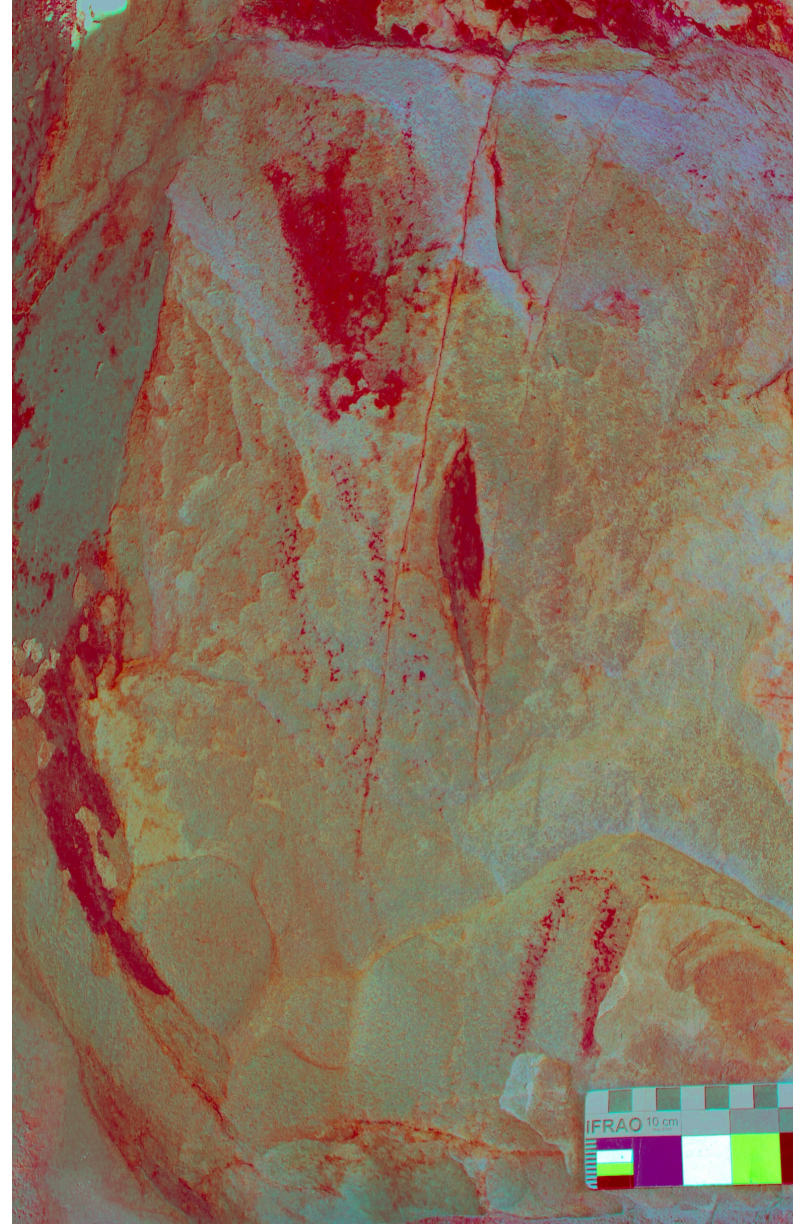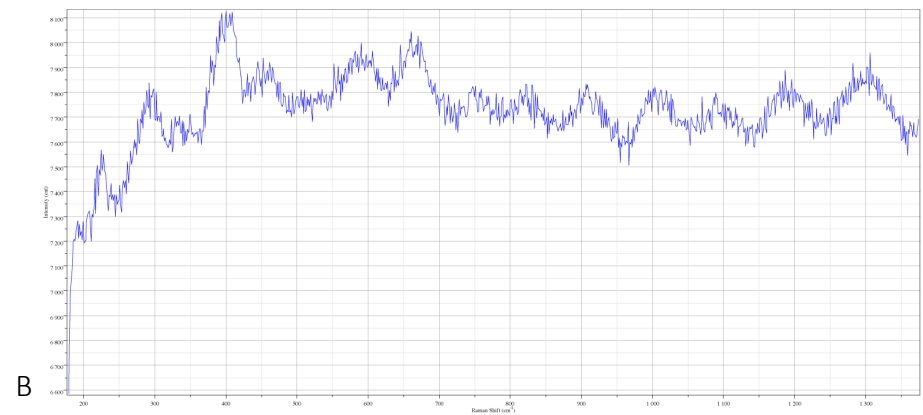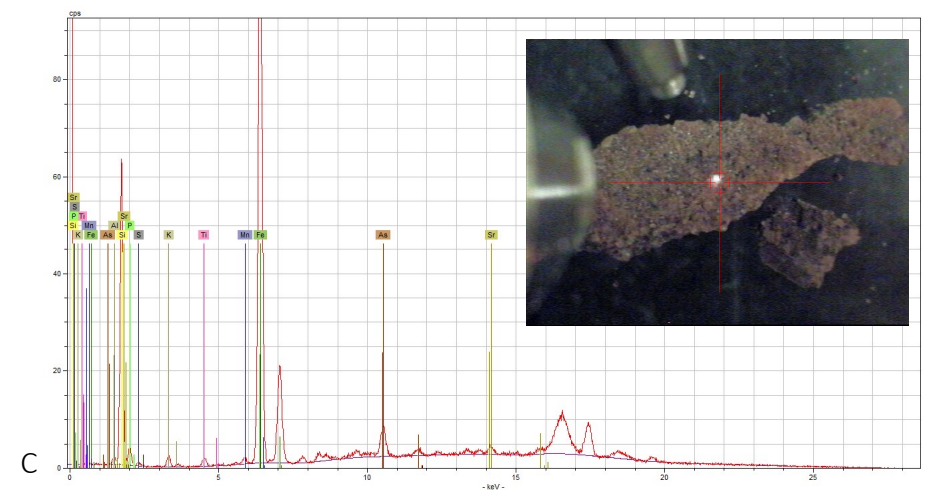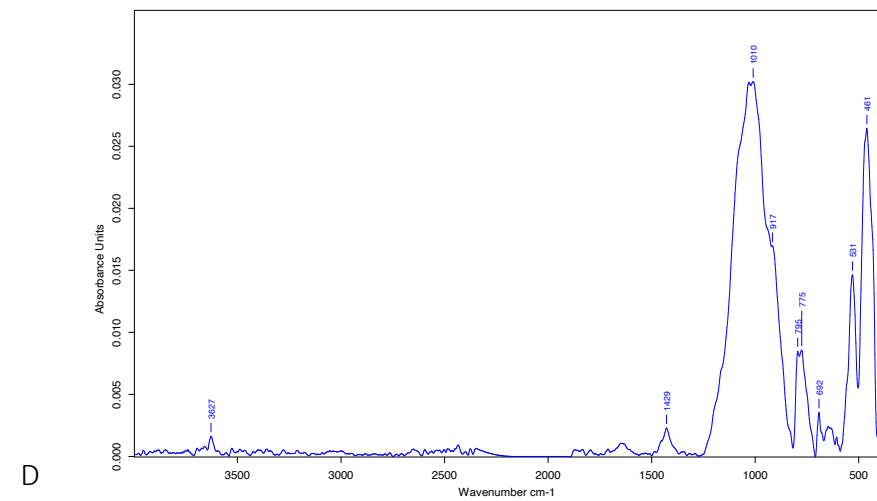

PANEL 10

**FIGURE 13: SAMPLE PUERTO\_10 FIGURES AND SAMPLING LOCATION (A); MICRO-RAMAN (B) AND EDXRF (C) AND ATR-FTIR (D) SPECTRA.**

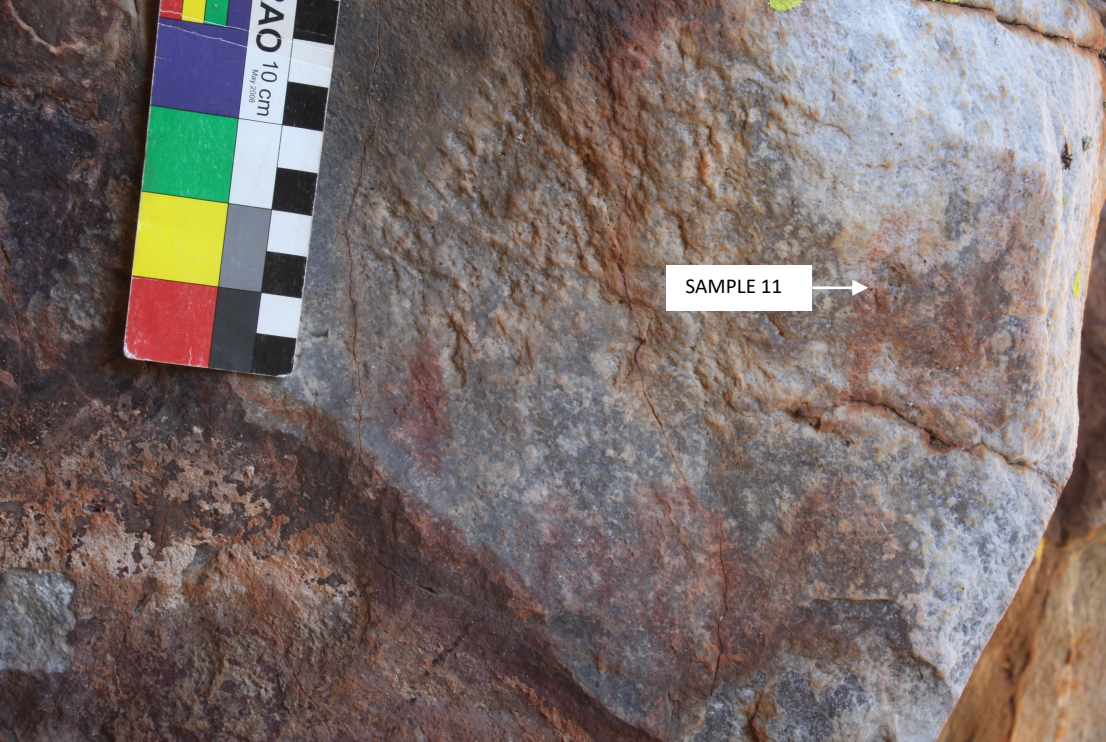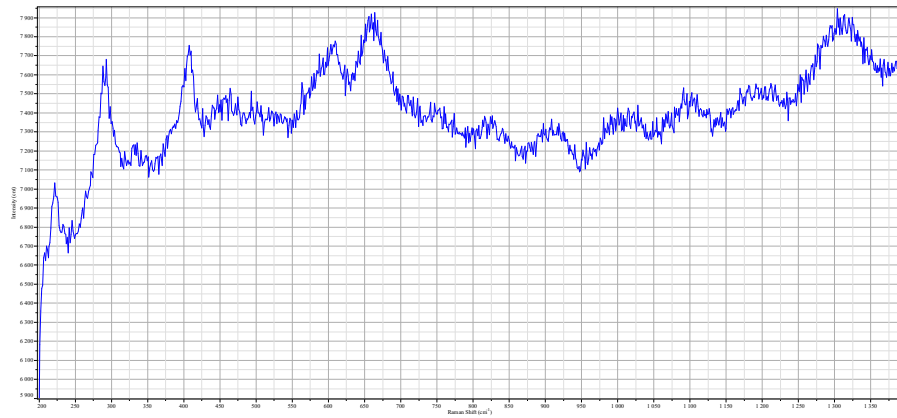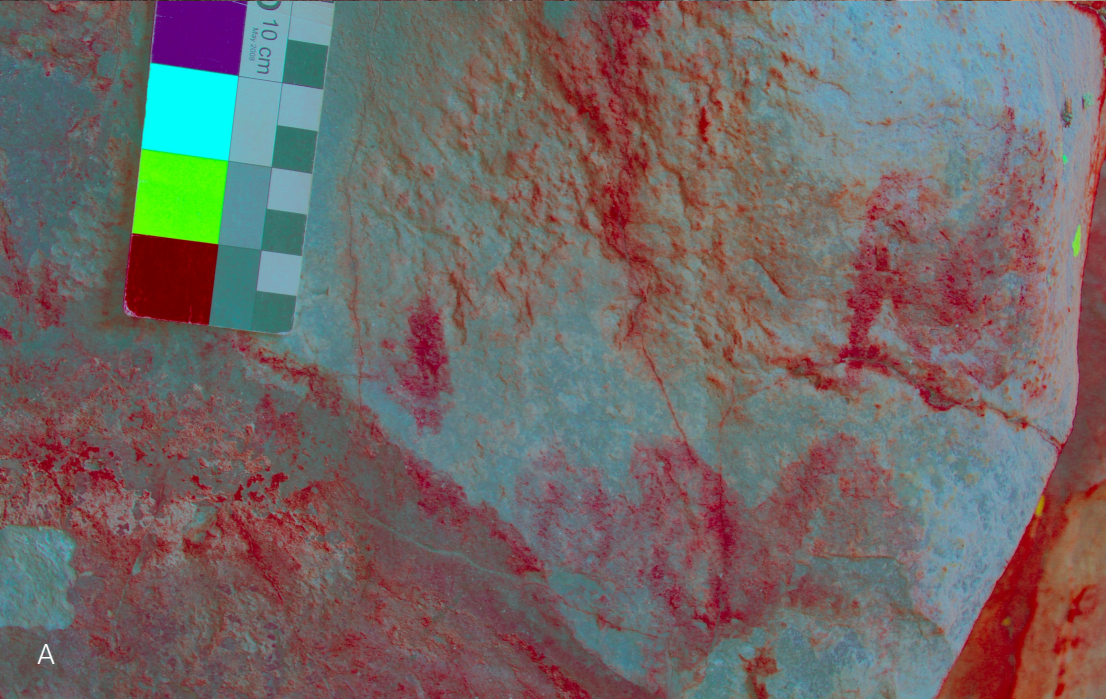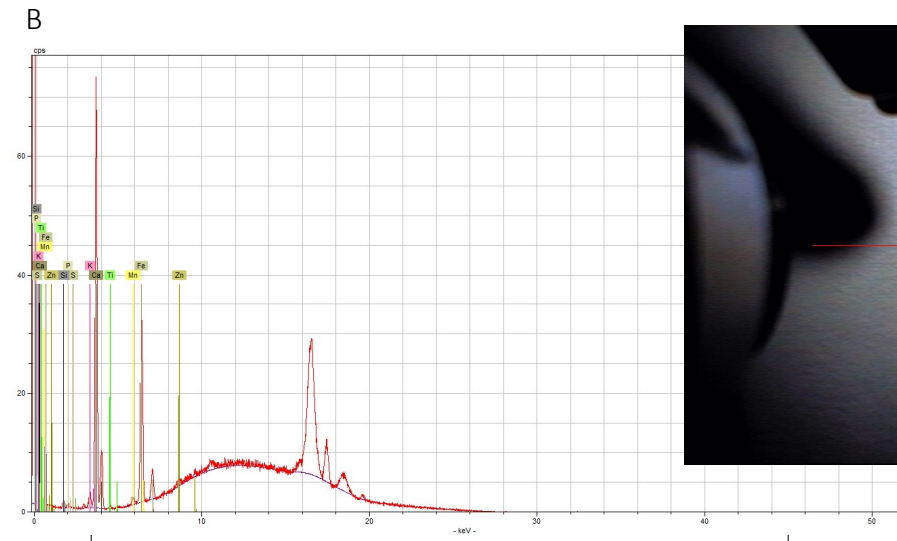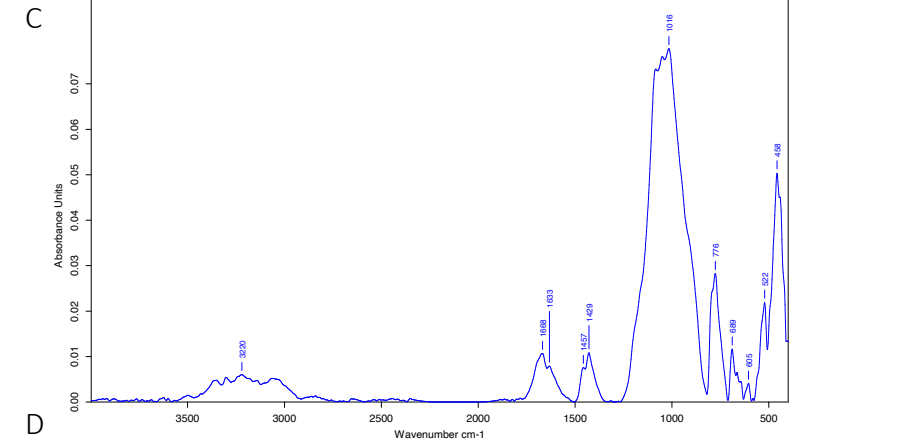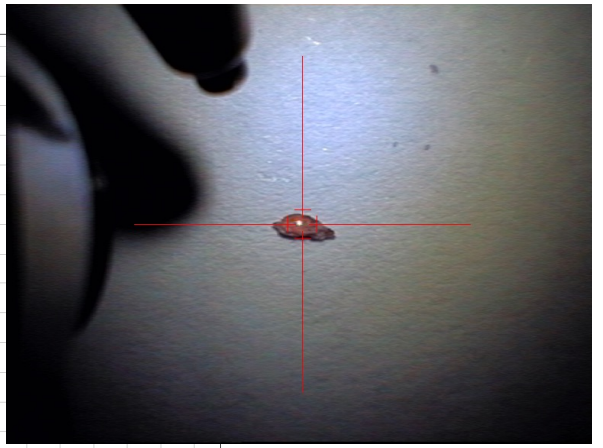

**FIGURE 14:** SAMPLE PUERTO\_11 FIGURES AND SAMPLING LOCATION (A); MICRO-RAMAN (B) AND EDXRF (C) AND ATR-FTIR (D) SPECTRA.

PANEL 11

A

D

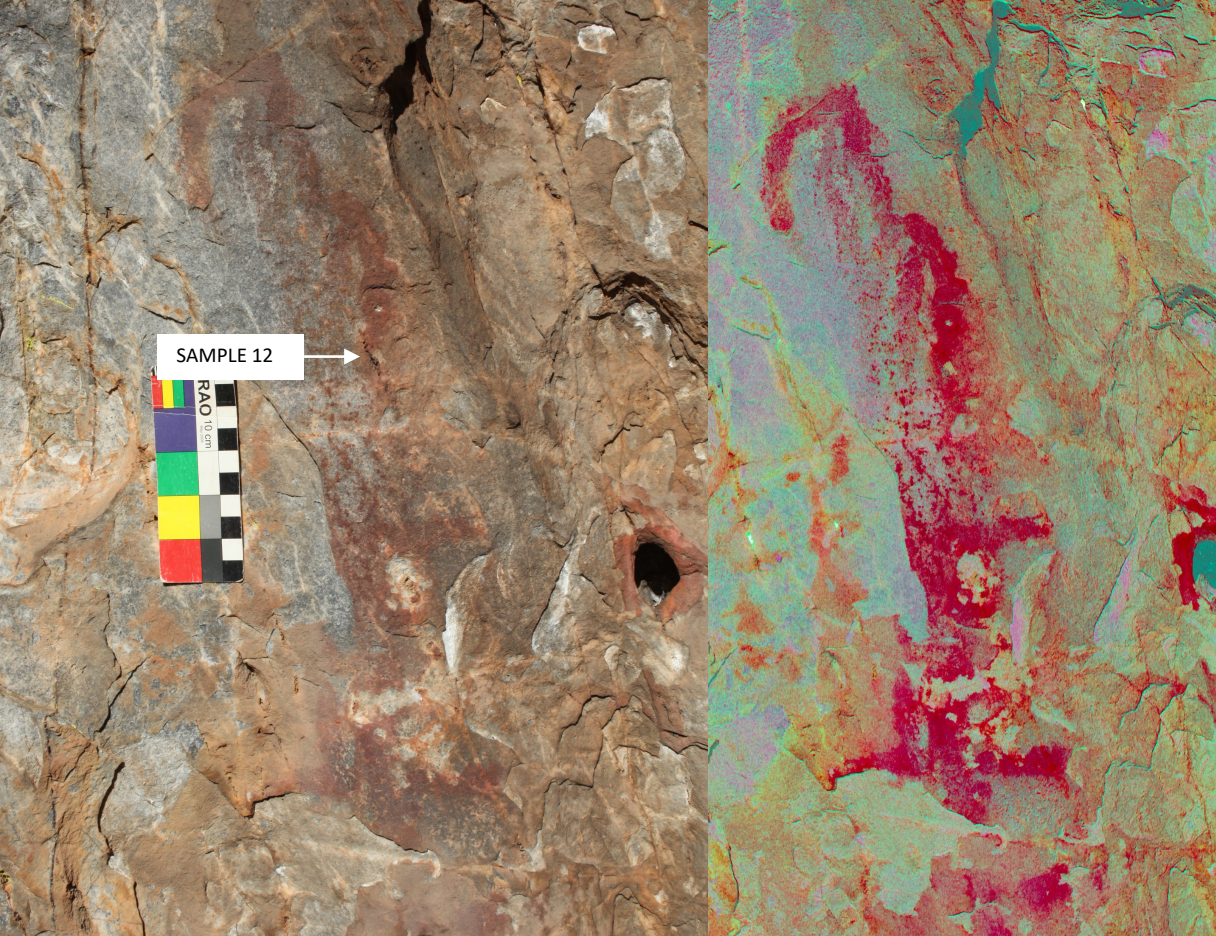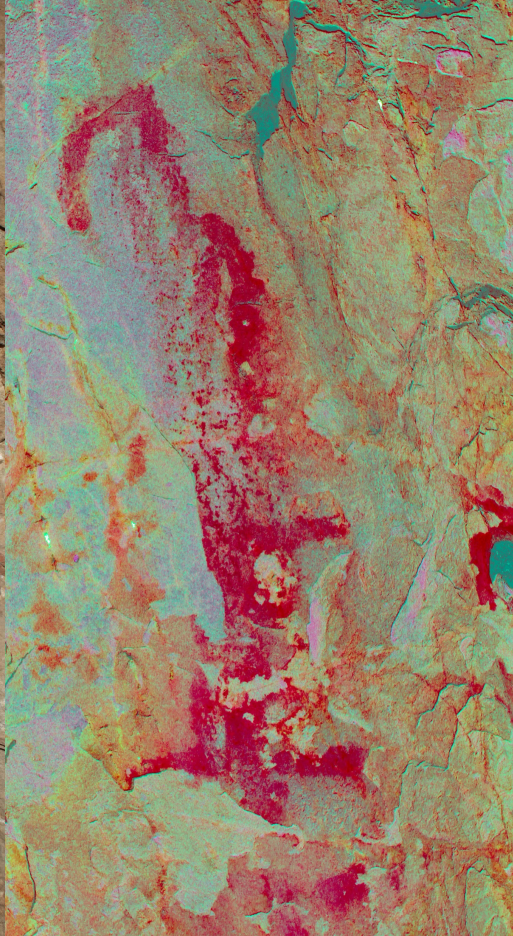

B

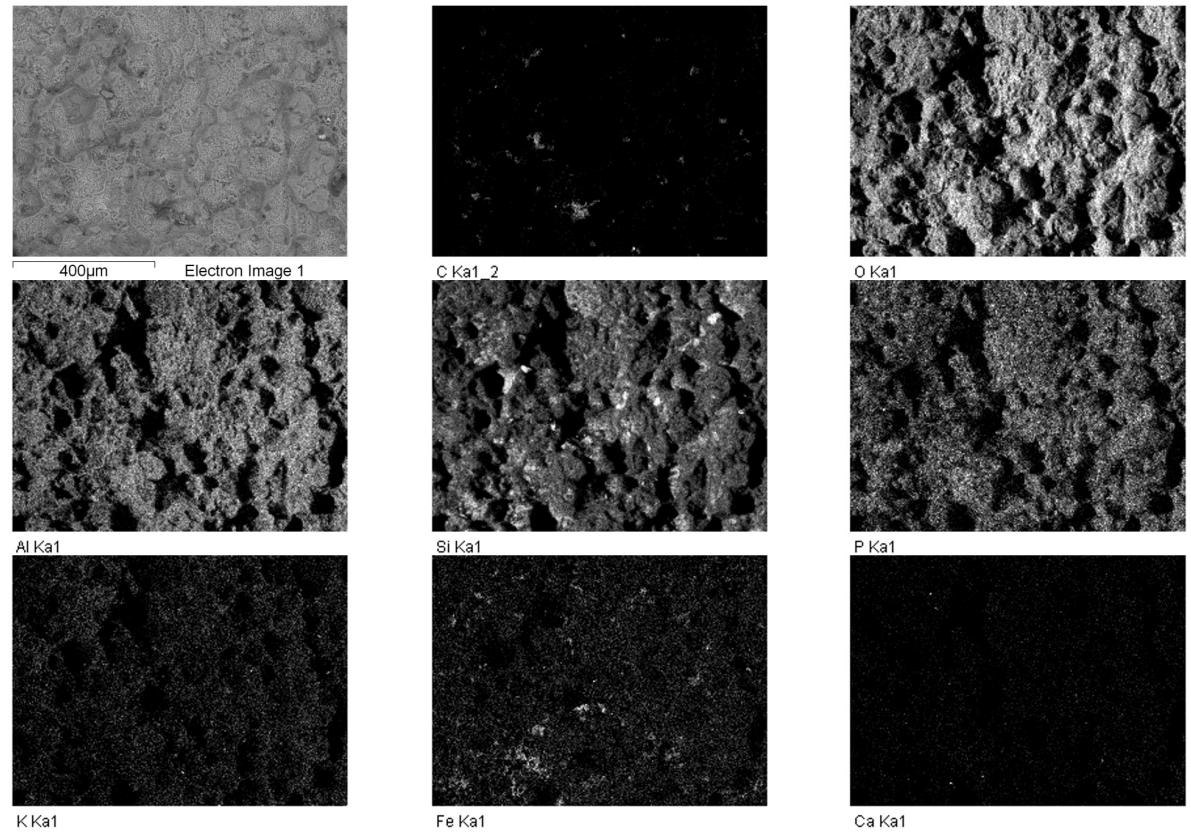

D

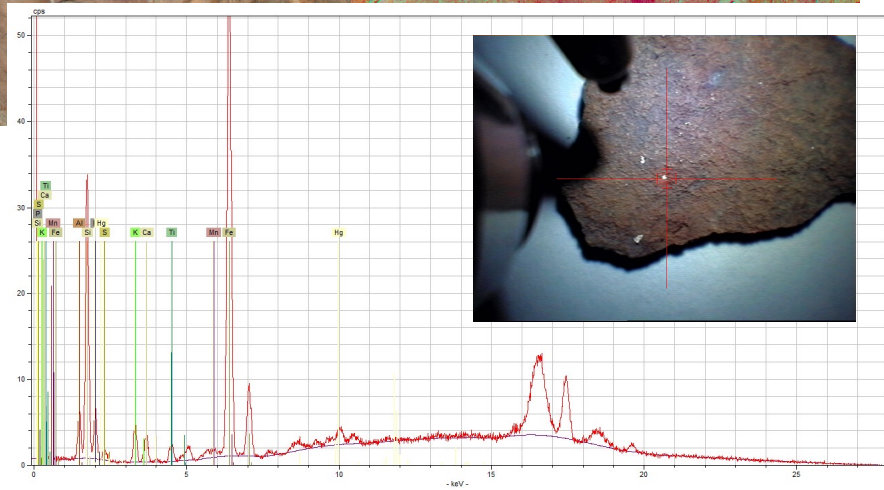

C

PANEL 12

**FIGURE 15: SAMPLE PUERTO\_12 FIGURES AND SAMPLING LOCATION (A); MICRO-RAMAN (B) AND EDXRF (C) SPECTRA AND SEM-EDS ELEMENTAL MAPPING (D).**

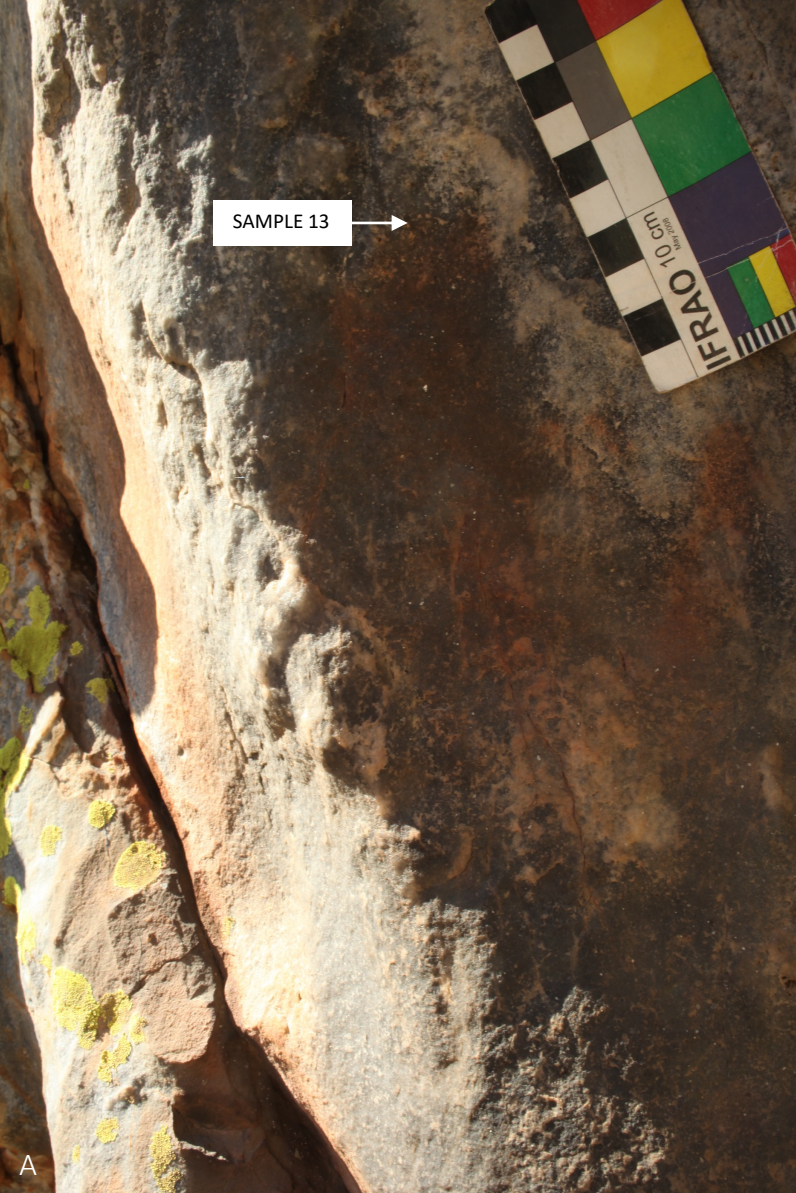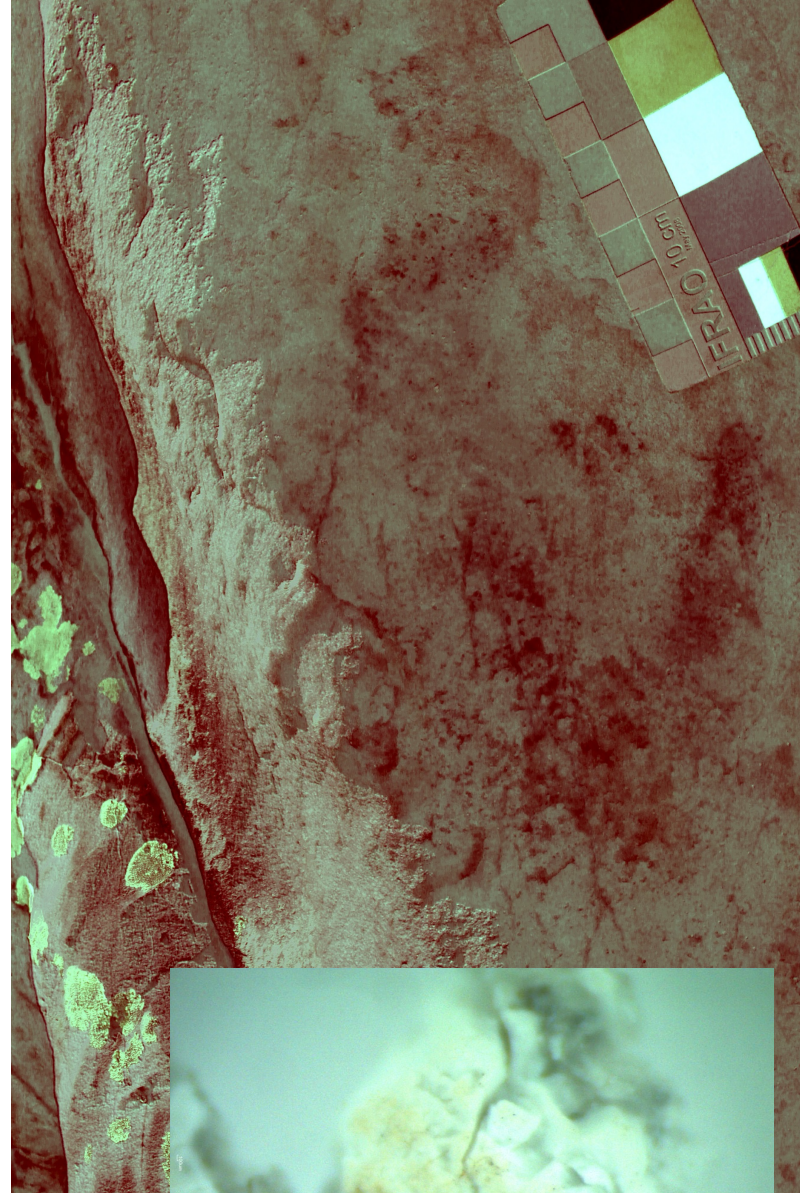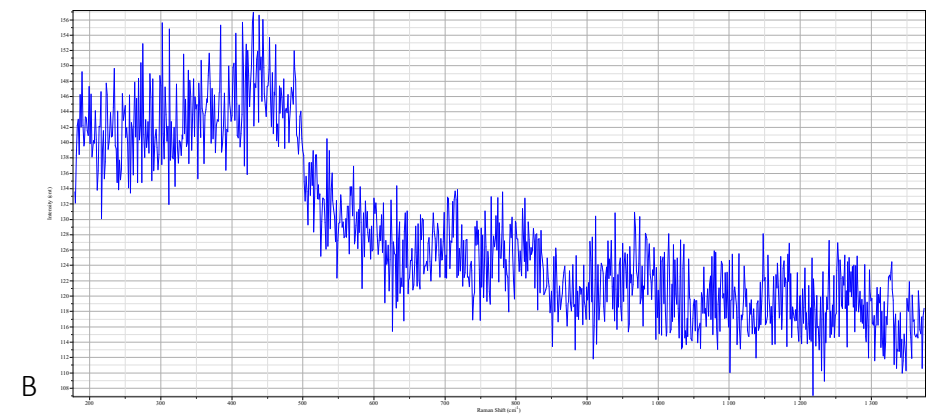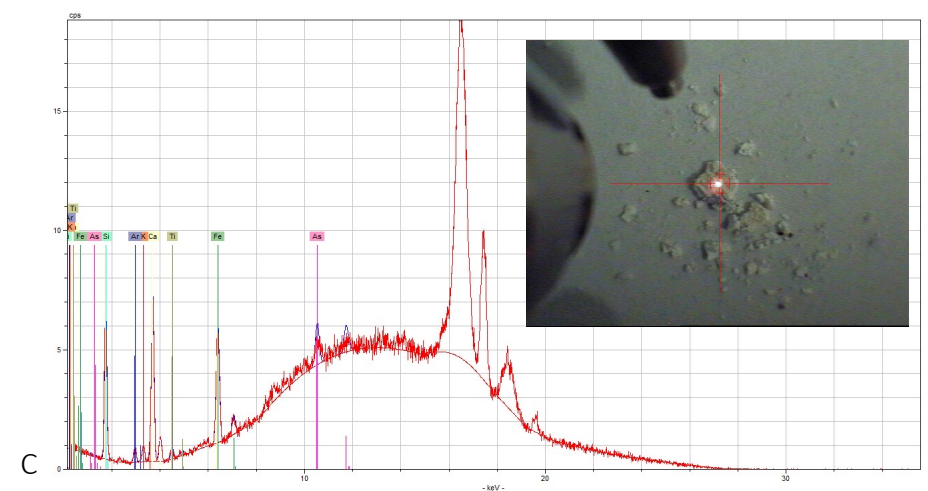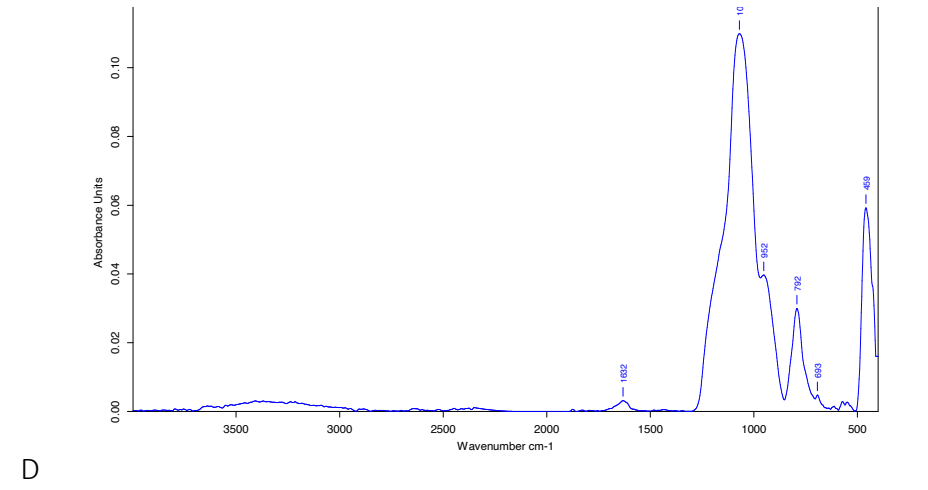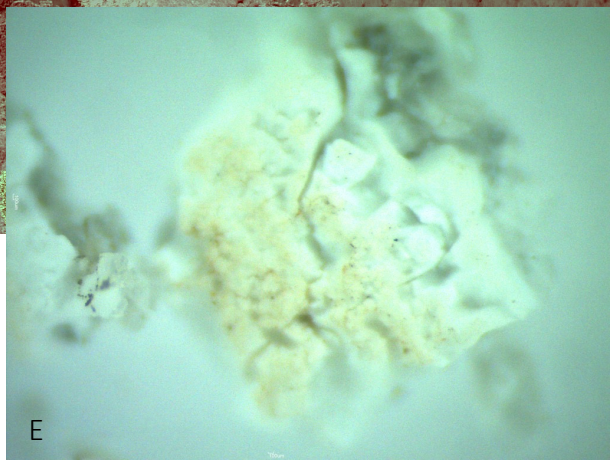

**FIGURE 16: SAMPLE PUERTO\_13 FIGURES AND SAMPLING LOCATION (A); MICRO-RAMAN (B), EDXRF (C) AND ATR-FTIR (D) SPECTRA AND STEREO MICROSCOPE IMAGE (E).**

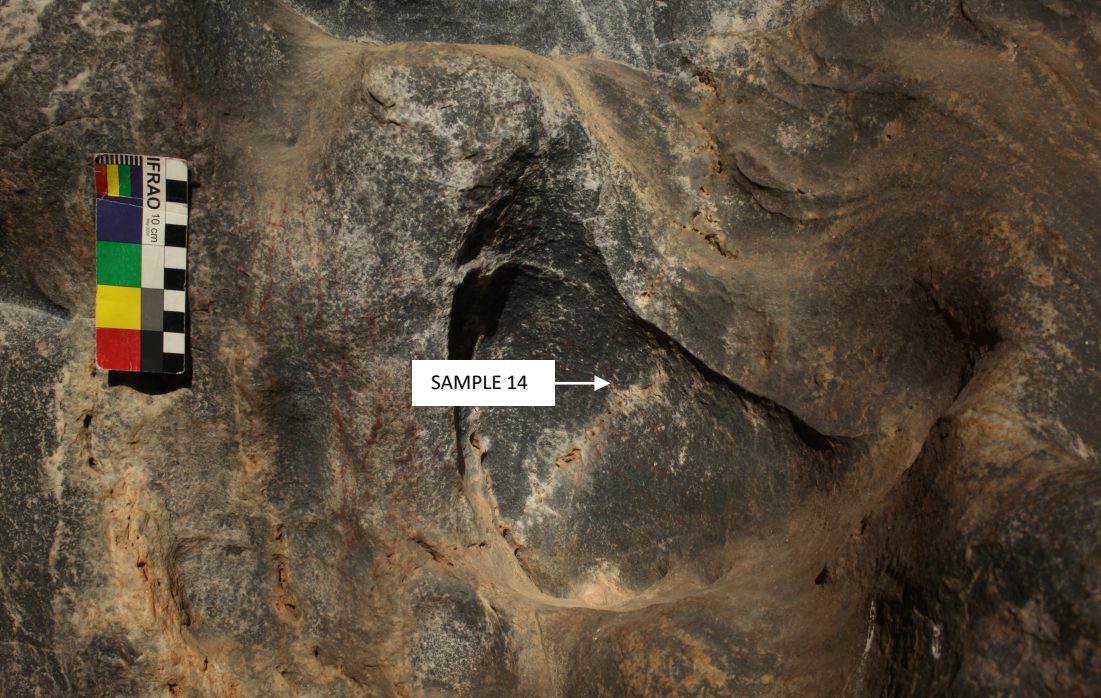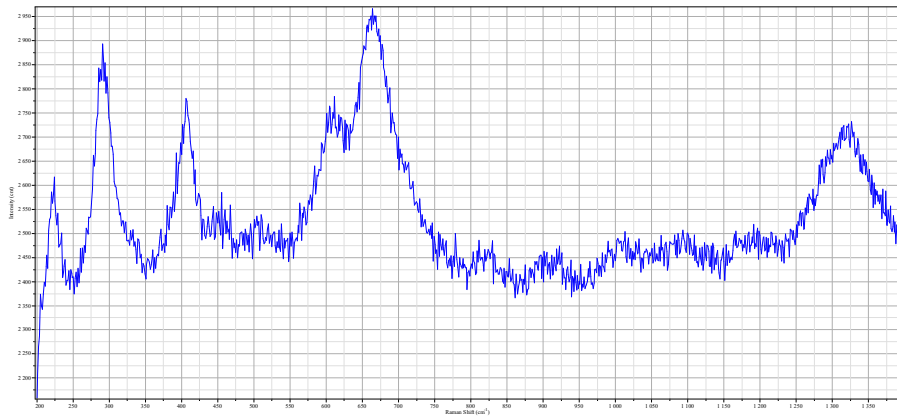

**FIGURE 17: SAMPLE PUERTO\_14**  
FIGURES AND SAMPLING LOCATION (A);  
MICRO-RAMAN (B), EDXRF (C), AND ATR-  
FTIR (D) SPECTRA AND STEREO  
MICROSCOPE IMAGE (E).

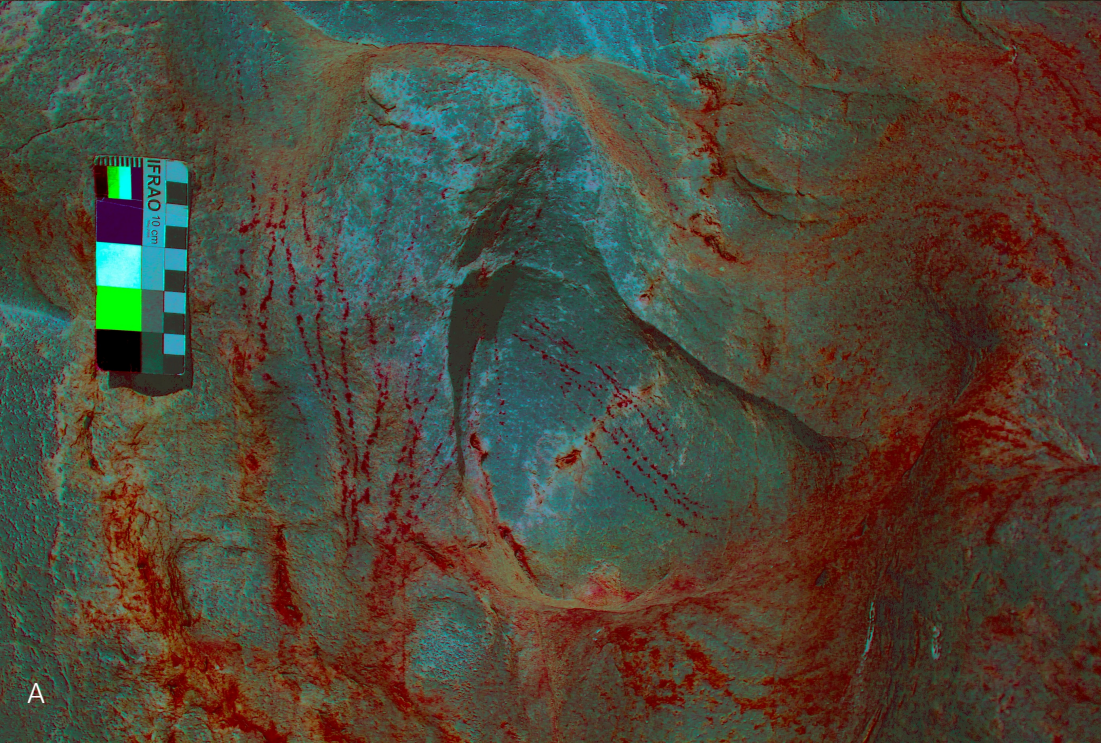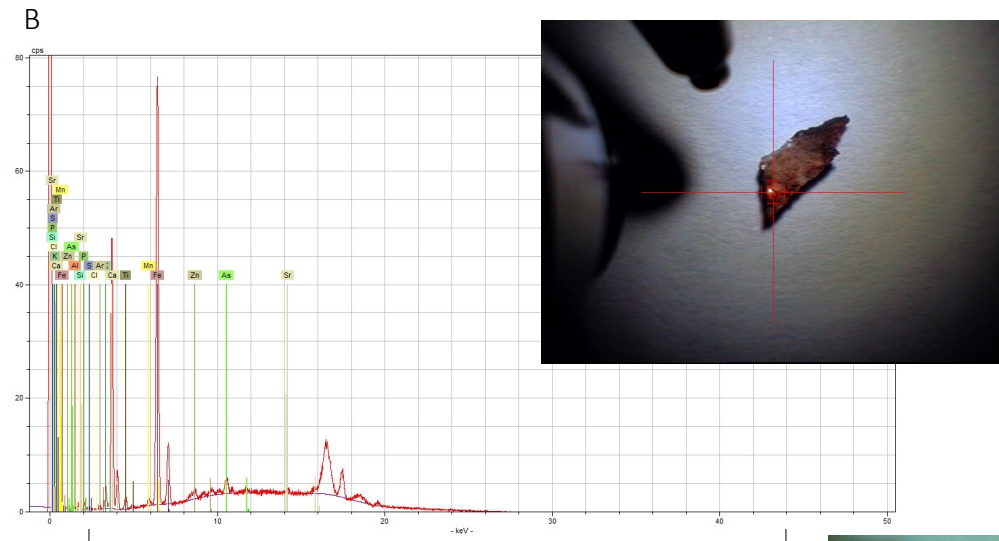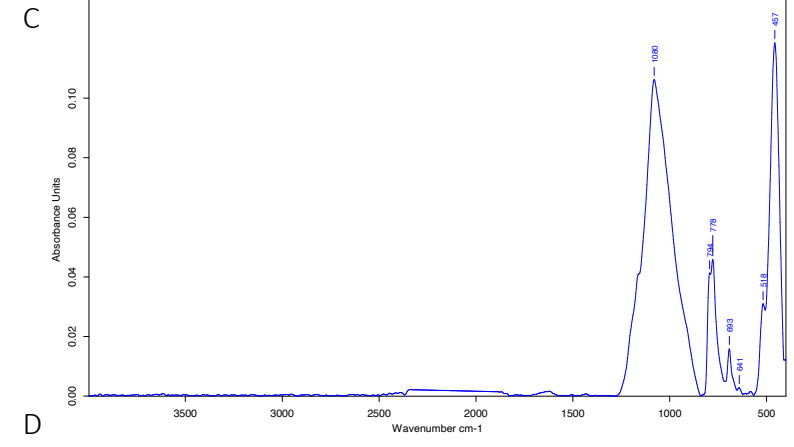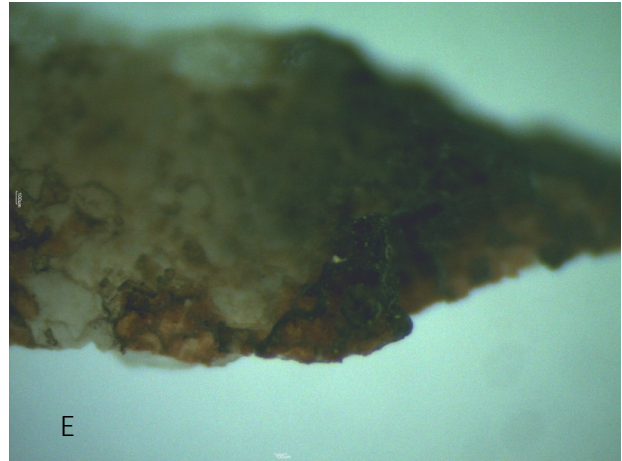

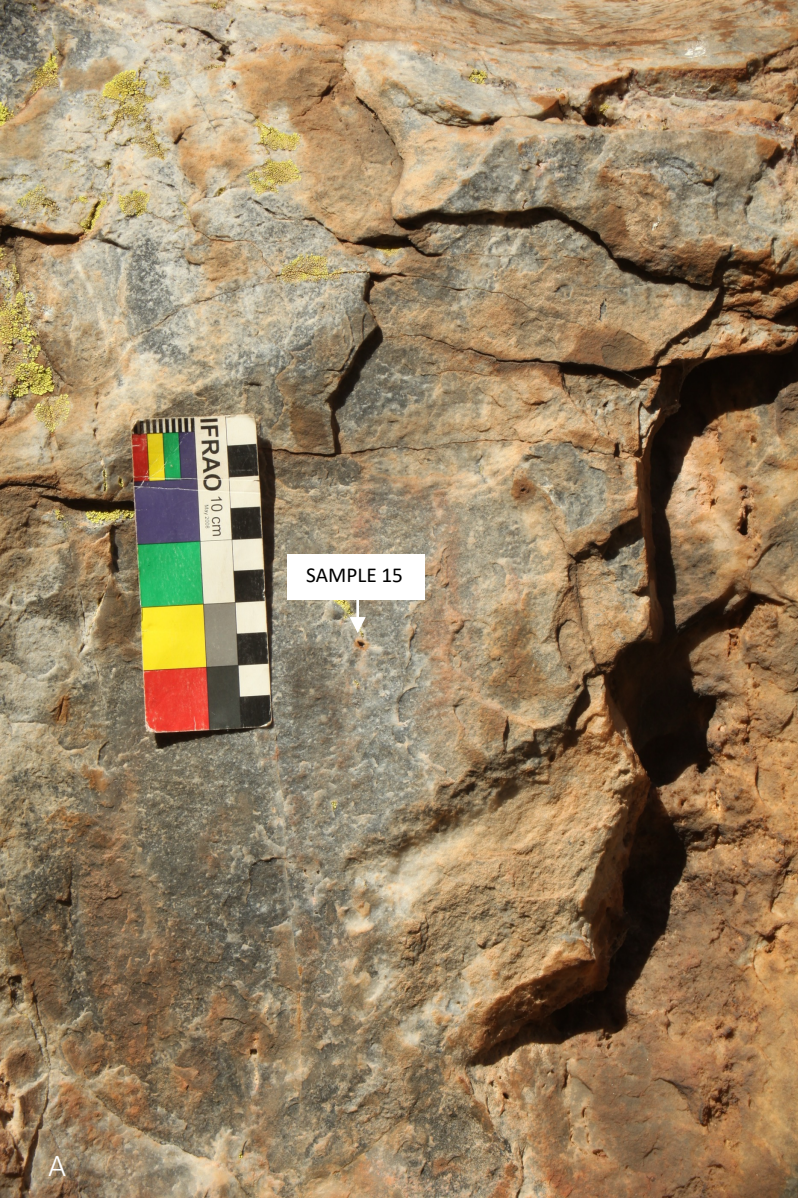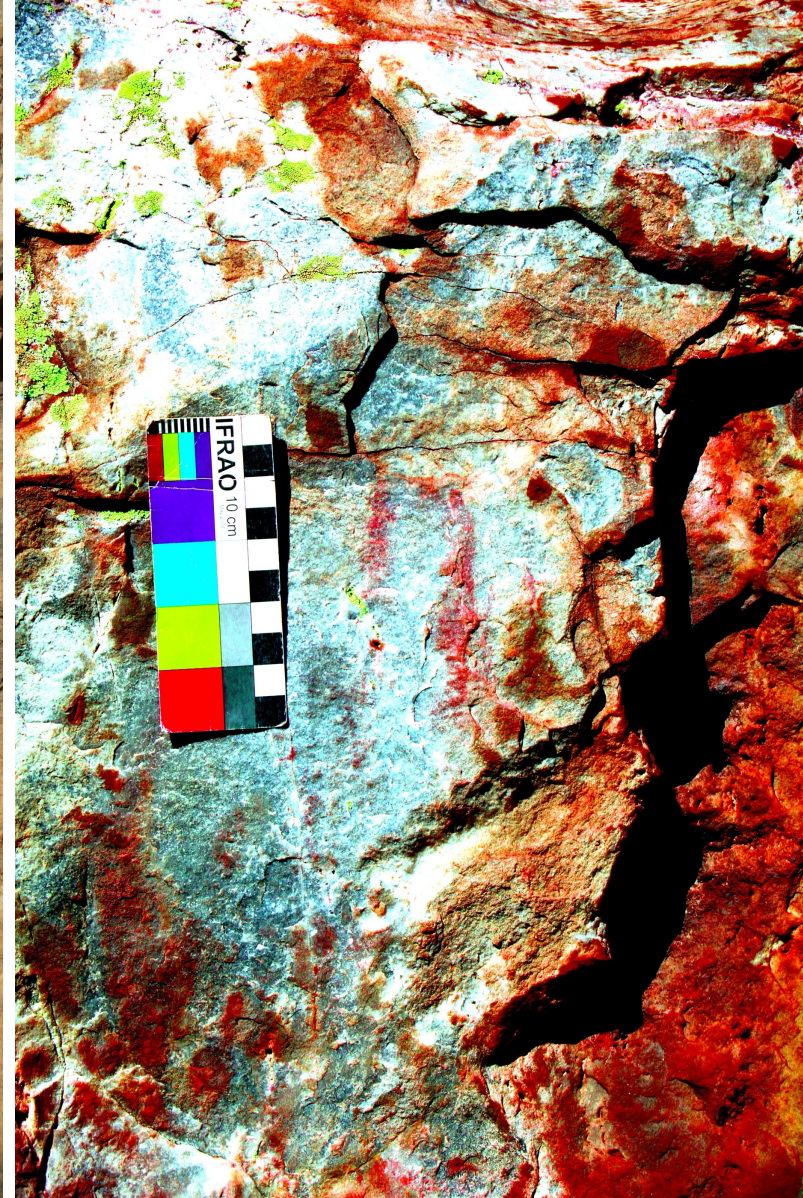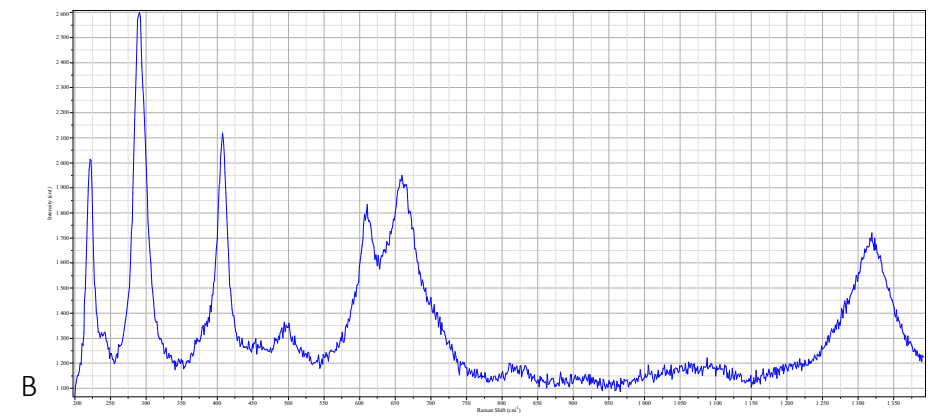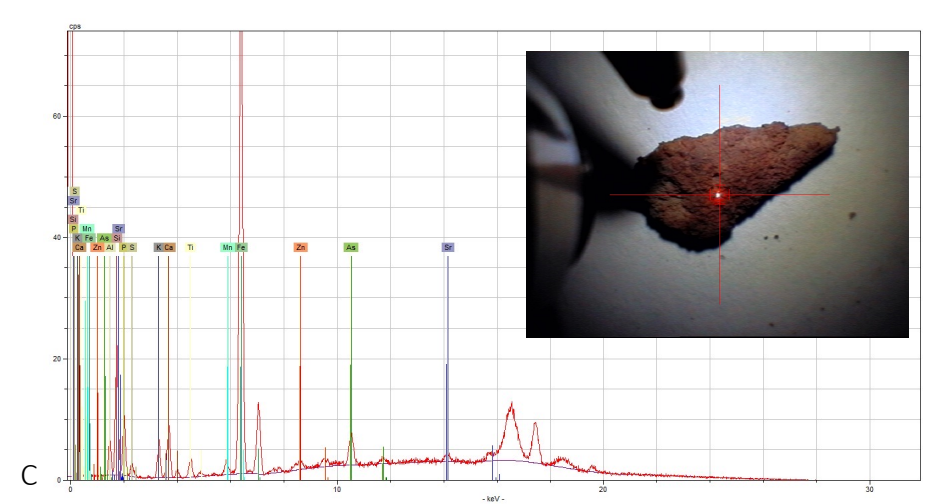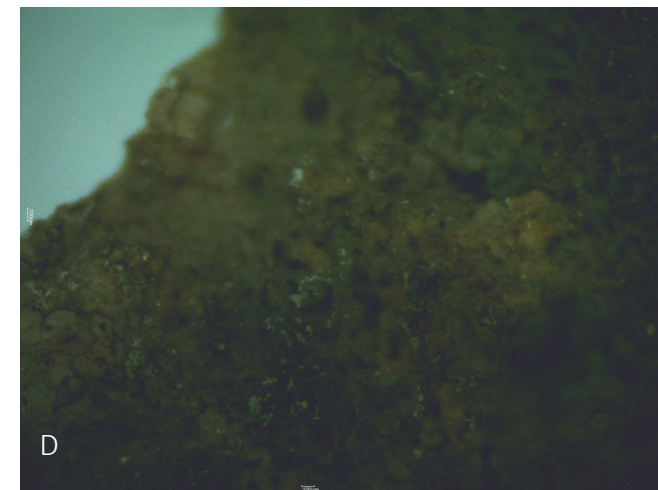

PANEL 15

**FIGURE 18:** SAMPLE PUERTO\_15 FIGURES AND SAMPLING LOCATION (A); MICRO-RAMAN (B) AND EDXRF (C) SPECTRA AND STEREO MICROSCOPE IMAGE (D).

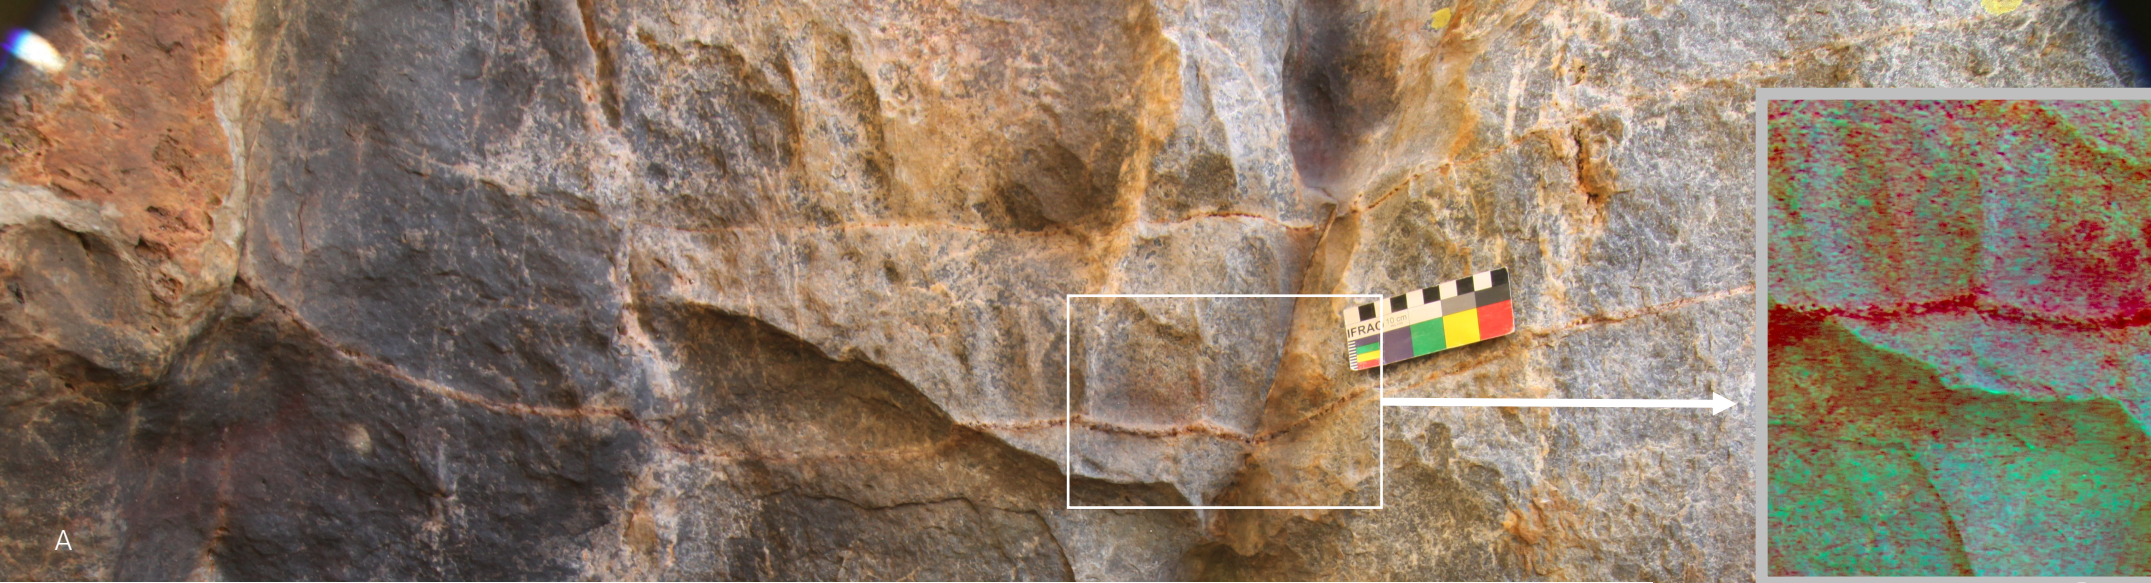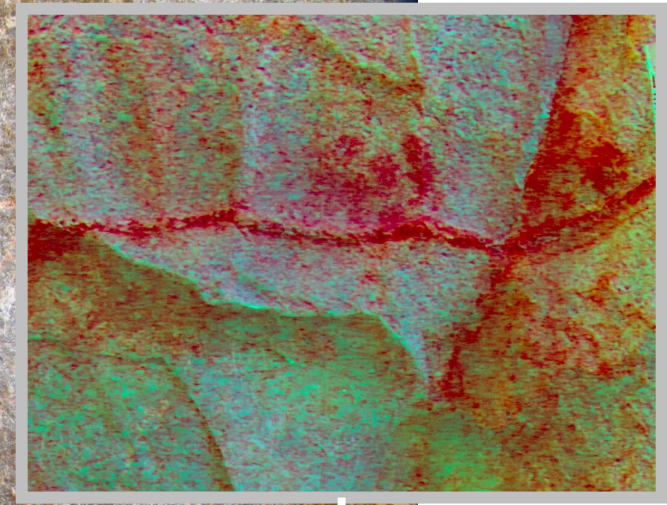

A

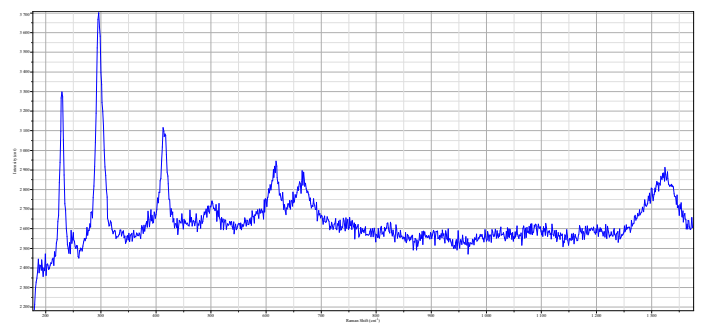

B

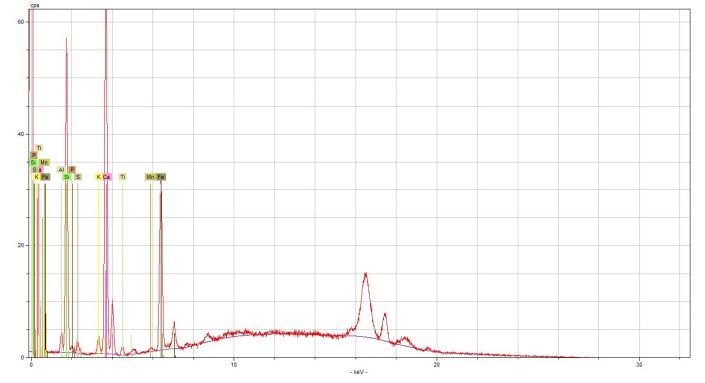

C

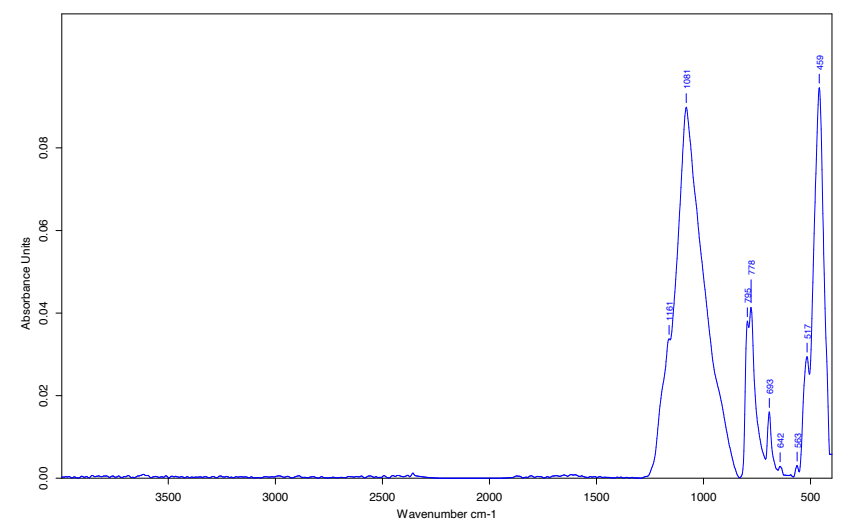

D

**FIGURE 19:** SAMPLE PUERTO\_16 FIGURES AND SAMPLING LOCATION (A); MICRO-RAMAN (B), EDXRF (C) AND ATR-FTIR (D) SPECTRA AND STEREO MICROSCOPE IMAGE (E).

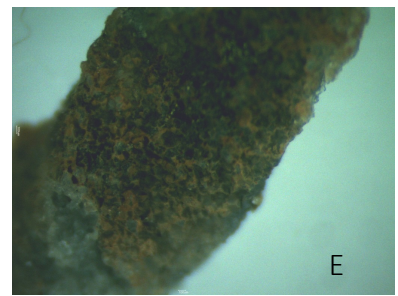

E

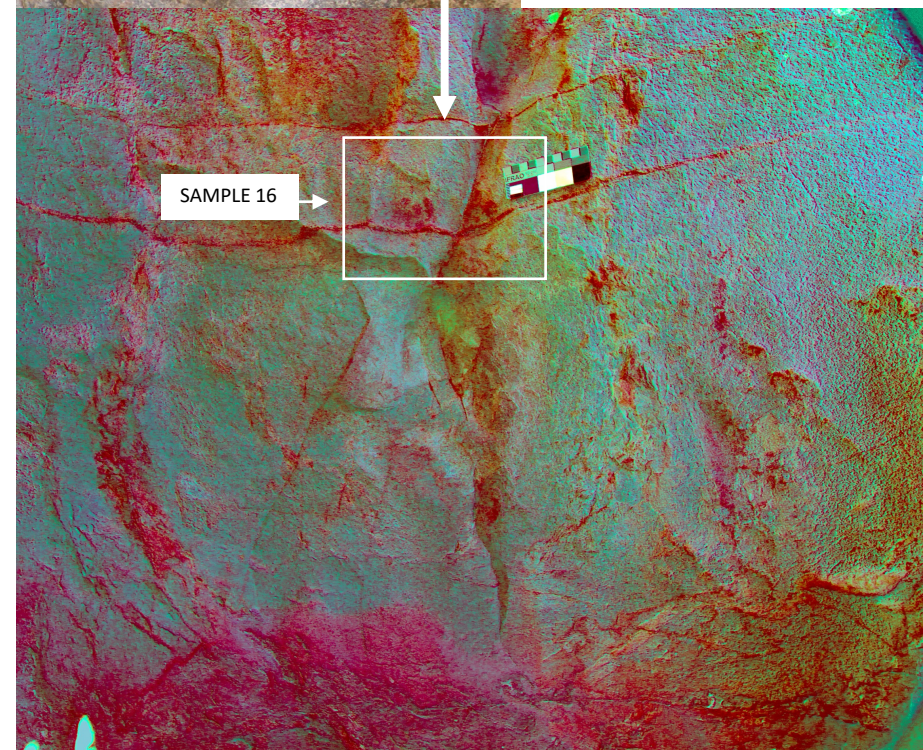

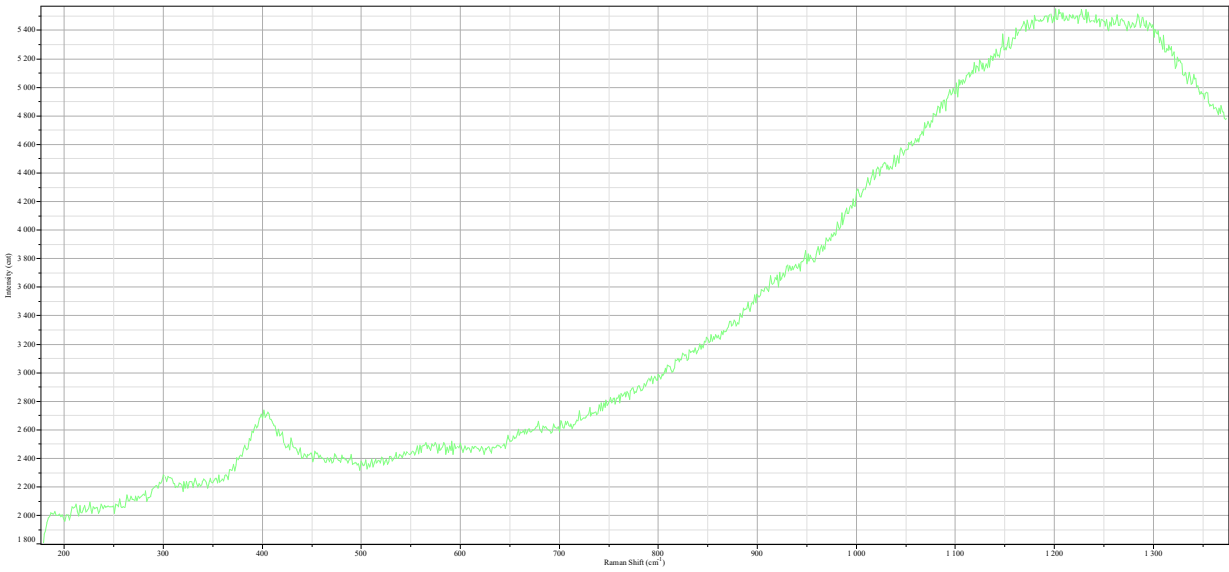

A

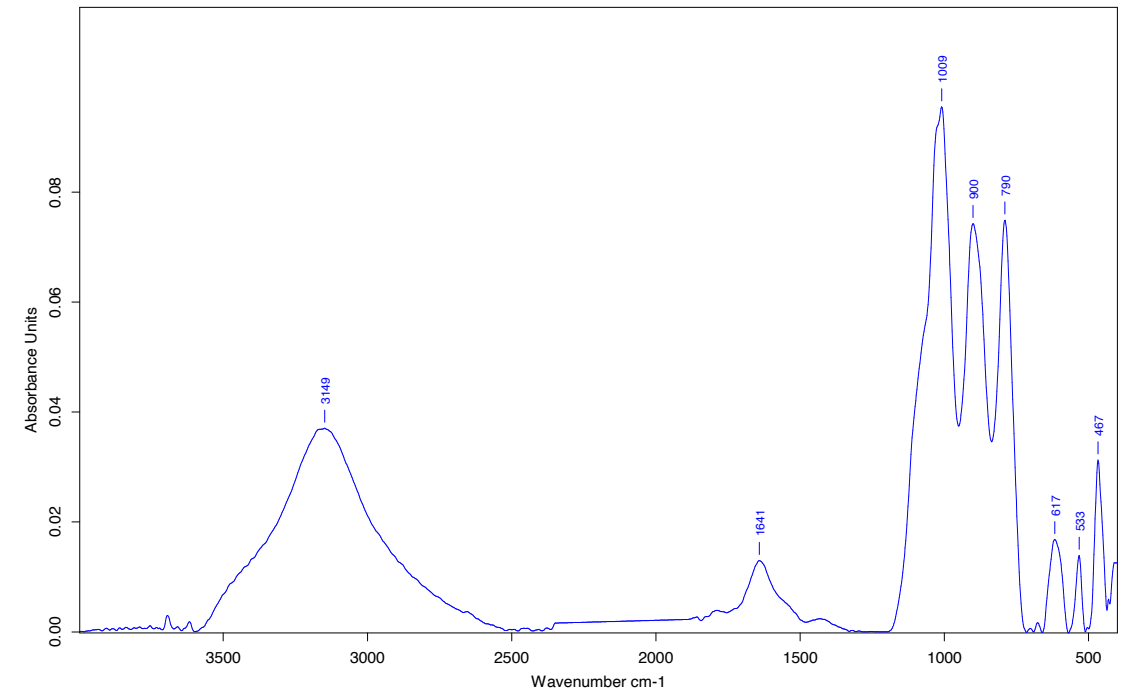

C

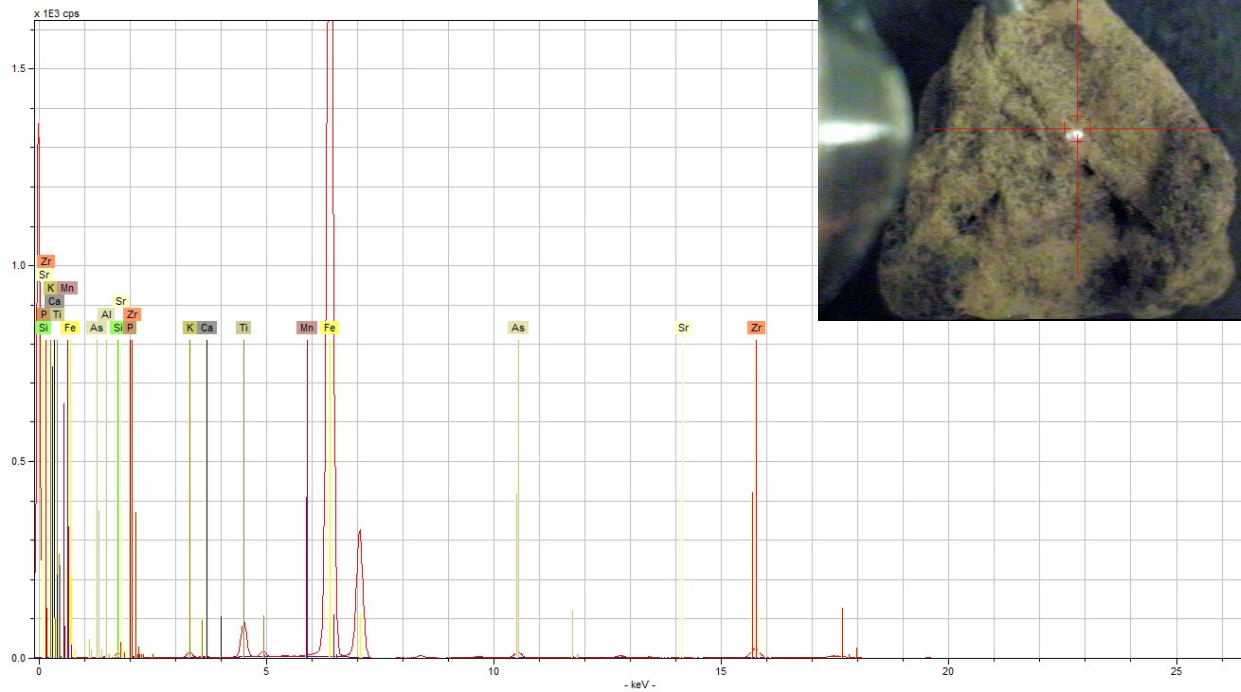

B

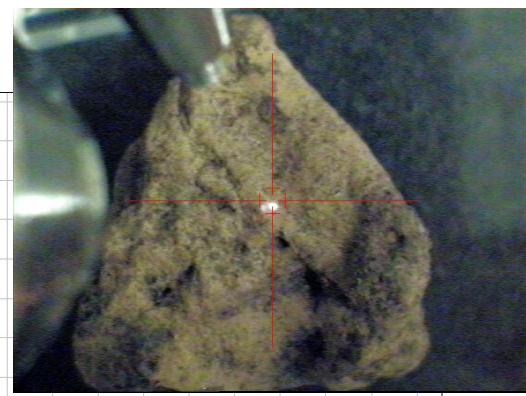

SAMPLE 17

**FIGURE 20: SAMPLE PUERTO\_17 MICRO-RAMAN (A), EDXRF (B) AND ATR-FTIR (C) SPECTRA AND STEREO MICROSCOPE IMAGE (D).**

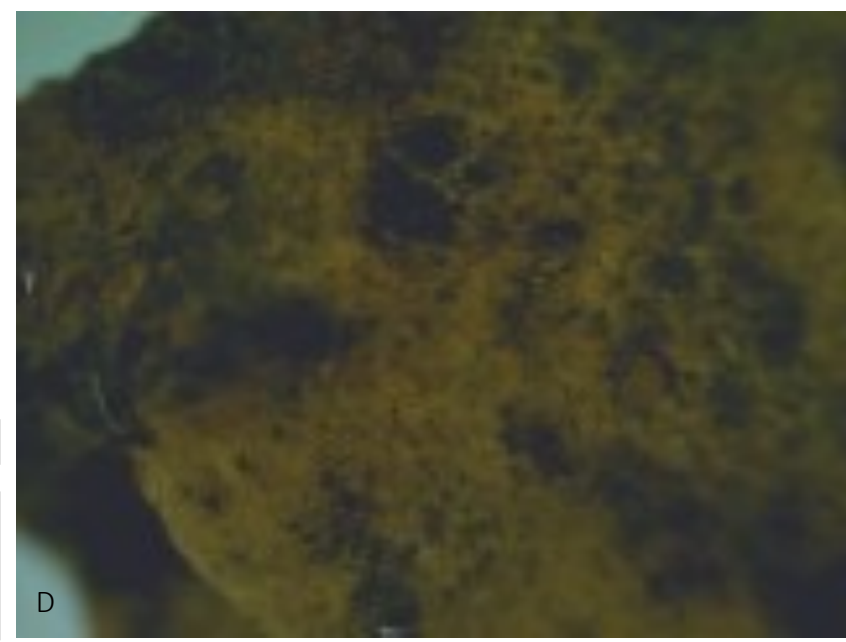

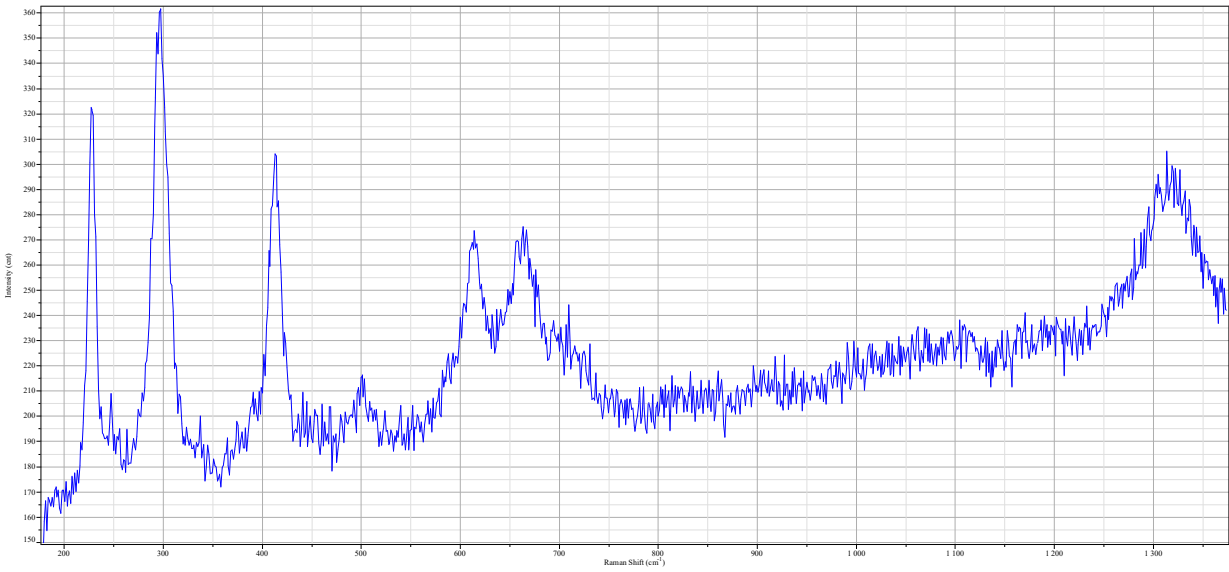

A

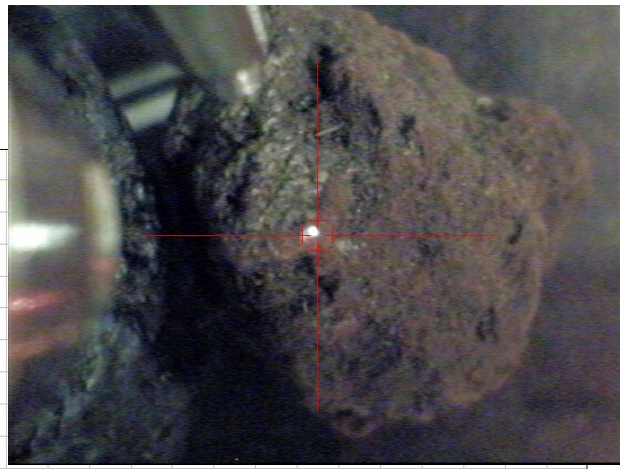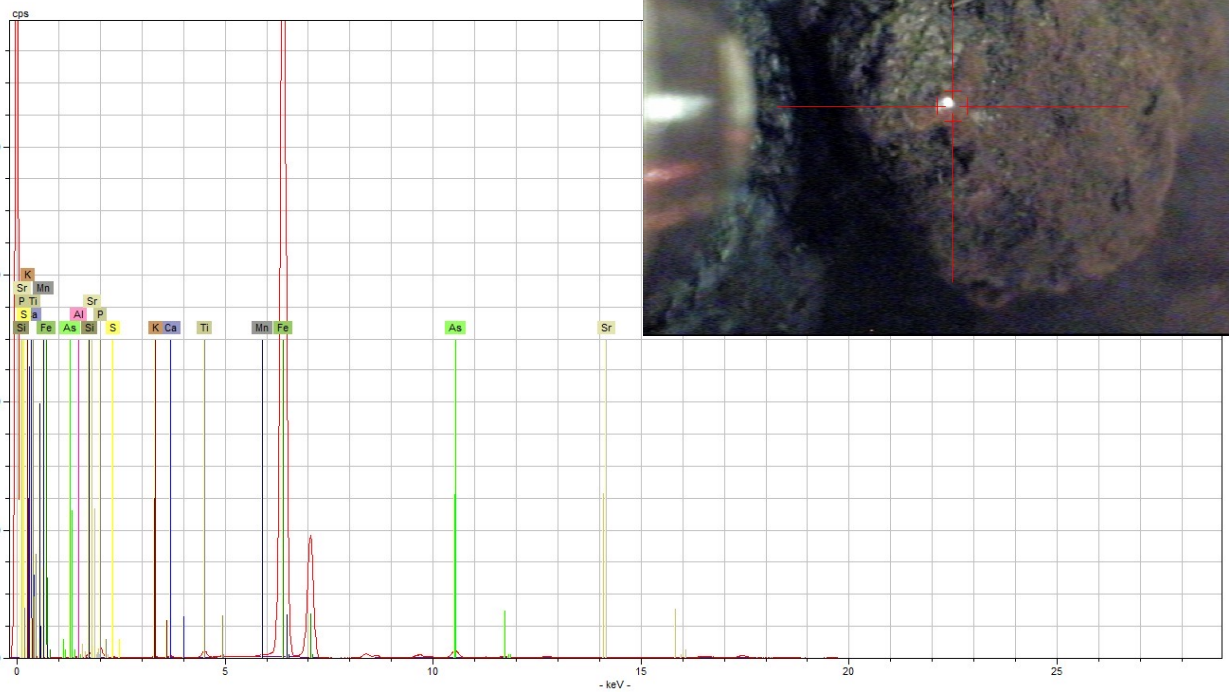

B

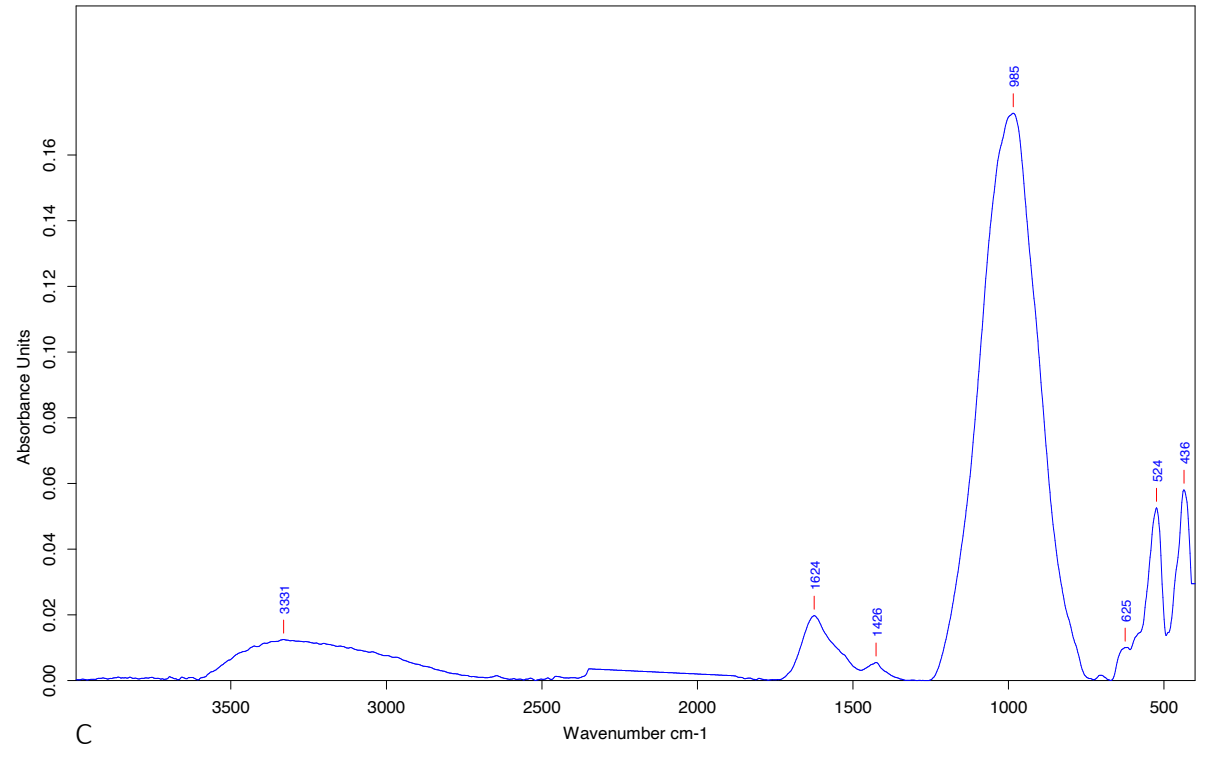

C

SAMPLE 18

**FIGURE 21:** SAMPLE PUERTO\_18 MICRO-RAMAN (A) AND EDXRF (B) AND ATR-FTIR (C) SPECTRA.

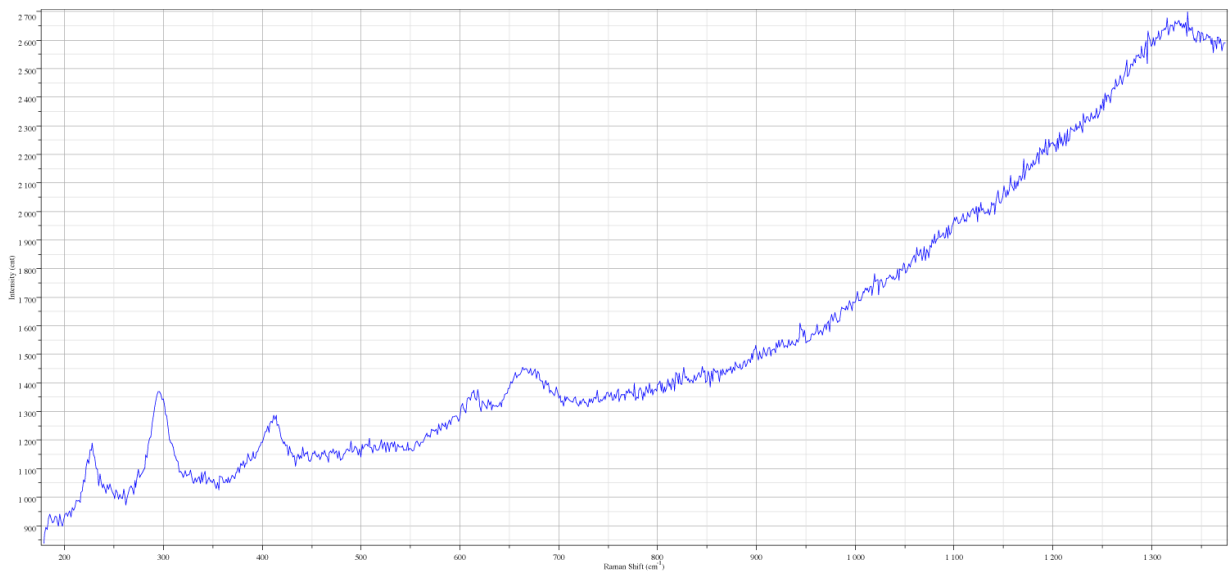

A

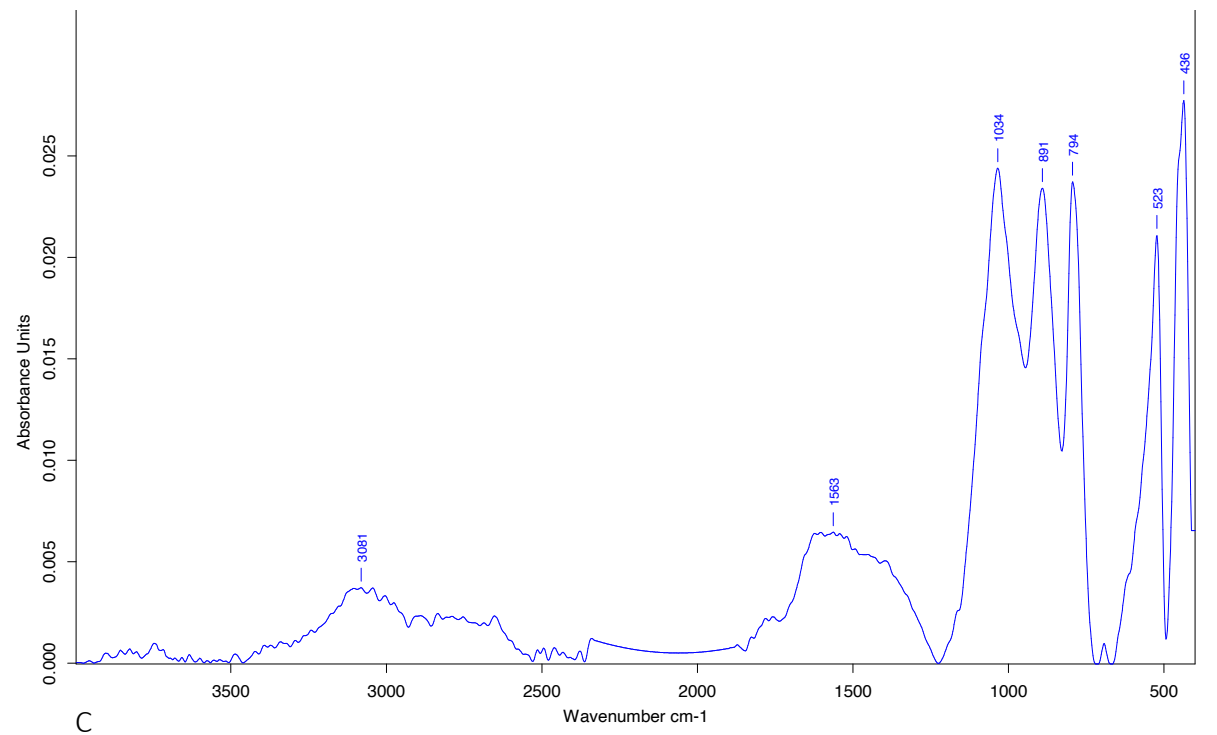

C

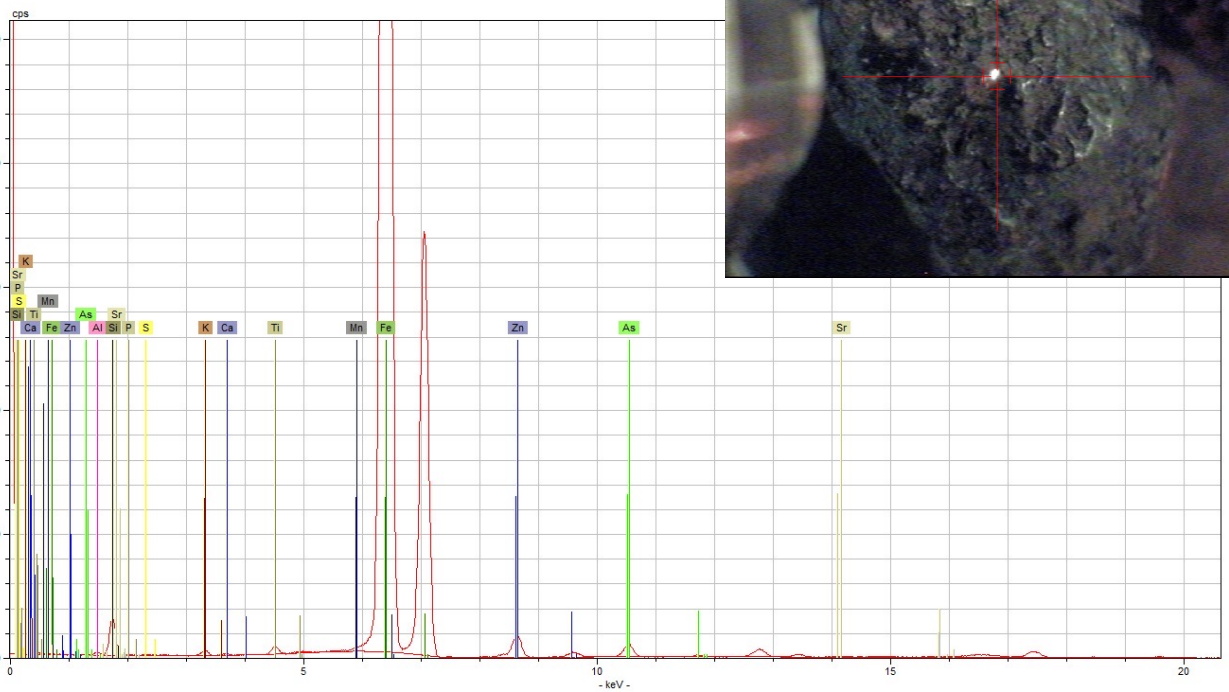

B

SAMPLE 19

**FIGURE 22:** SAMPLE PUERTO\_19 MICRO-RAMAN (A) AND EDXRF (B) AND ATR-FTIR (C) SPECTRA.
